1 Movie-watching outperforms rest for functional connectivity-based prediction of  
2 behavior

3

4 Emily S. Finn<sup>1,2\*</sup>, Peter A. Bandettini<sup>1</sup>

5

6 **Abstract**

7 A major goal of human neuroscience is to relate differences in brain function to differences in  
8 behavior across people. Recent work has established that whole-brain functional connectivity  
9 patterns are relatively stable within individuals and unique across individuals, and that features of  
10 these patterns predict various traits. However, while functional connectivity is most often  
11 measured at rest, certain tasks may enhance individual signals and improve sensitivity to  
12 behavioral differences. Here, we show that compared to the resting state, functional connectivity  
13 measured during naturalistic viewing—i.e., movie watching—yields more accurate predictions of  
14 trait-like phenotypes in the both cognitive and emotional domains. Traits could be predicted using  
15 less than three minutes of data from single video clips, and clips with highly social content gave  
16 the most accurate predictions. Results suggest that naturalistic stimuli amplify individual  
17 differences in behaviorally relevant brain networks.

18

19 <sup>1</sup>Section on Functional Imaging Methods, Laboratory of Brain and Cognition, National Institute  
20 of Mental Health, Bethesda, Md. USA

21 <sup>2</sup>Department of Psychological and Brain Sciences, Dartmouth College, Hanover, N.H. USA

22

23 \*Corresponding author: [emily.s.finn@dartmouth.edu](mailto:emily.s.finn@dartmouth.edu)

## 1 **Introduction**

2

3 Individual patterns of whole-brain functional connectivity are stable and unique enough to serve  
4 as a “fingerprint” that can identify people across time and brain states. Features of these patterns  
5 predict a growing list of phenotypes, including fluid intelligence (Finn et al., 2015), sustained  
6 attention (Rosenberg et al., 2016), and personality traits (Hsu et al., 2018), among others.  
7 Characterizing these patterns could give insight into the systems-level structure of trait-like  
8 phenotypes, and refining such predictive models may lead to biomarkers of present or future health  
9 status and other outcomes (Gabrieli et al., 2015; Dubois and Adolphs, 2016; Finn and Constable,  
10 2016; Woo et al., 2017).

11

12 Yet despite its trait-like aspects, functional connectivity also shows a considerable state-like  
13 component such that task demands modulate connectivity patterns at both the group and individual  
14 level (Waites et al., 2005; Finn et al., 2017; Gratton et al., 2018; Rosenberg et al., 2020). These  
15 observations raise the question, what is the best brain state is for studying individual differences?  
16 Investigators often default to rest as a supposedly neutral backdrop, and indeed, resting-state  
17 acquisitions have several advantages: they are easy to acquire and standardize across sites and  
18 populations, less vulnerable to performance or motivation confounds, and relatively robust to  
19 practice or repetition effects. However, rest is also more susceptible to arousal confounds and can  
20 reduce subject compliance, especially in hard-to-scan populations (Vanderwal et al., 2015;  
21 Huijbers et al., 2017). Other candidate states include the myriad tasks traditionally used in  
22 cognitive and social psychology, or naturalistic paradigms, in which participants watch movies or  
23 listen to stories. The latter are growing in popularity as a window into brain activity under rich and  
24 engaging conditions that are more ecologically valid than highly controlled tasks (Sonkusare et al.,  
25 2019).

26

27 Early work using movies and other naturalistic stimuli focused on how they tend to synchronize  
28 brain responses across people, resulting in similar spatiotemporal activity patterns in individuals  
29 experiencing the same stimulus (Hasson et al., 2004; Nastase et al., 2019). One might therefore  
30 expect that these conditions would quench between-subject variability, making them undesirable  
31 for studying individual differences. But in fact, observable individual differences persist atop this

1 shared response, in both activity (Finn et al., 2020) and functional connectivity (Geerligts et al.,  
2 2015; Vanderwal et al., 2017; Wang et al., 2017). These findings complement the somewhat  
3 paradoxical observation that even among traditional paradigms (e.g., n-back, finger tapping,  
4 emotional faces), conditions that make subjects' connectivity profiles more similar to one another  
5 also make them easier to identify (Finn et al., 2017). One interpretation of these findings is that  
6 any task, but especially rich, engaging tasks, constrain the functional connectivity space in a way  
7 that reduces overall between-subject variance but makes the remaining variance more stable and  
8 trait-like. Empirically, the strikingly similar patterns of evoked activity during movie watching do  
9 not seem to come at a cost to individual identifiability; rather, the most important individual  
10 features are preserved or even enhanced during these conditions.

11  
12 However, the ultimate goal of most individual differences research is not simply to identify a given  
13 individual across repeat scans, but to relate variability in brain functional organization to real-  
14 world (out-of-scanner) behavior. To this end, the more relevant question is whether connectivity  
15 patterns during naturalistic paradigms improve sensitivity to behavioral differences. Previous work  
16 using connectivity during traditional tasks to predict fluid intelligence showed that, while certain  
17 tasks enjoyed larger advantages than others, all tasks outperformed rest, even when the task state  
18 was seemingly unrelated to the construct to be predicted (e.g., even functional connectivity during  
19 a finger-tapping task offers improved predictions of fluid intelligence) (Greene et al., 2018).  
20 Extrapolating from rest to traditional tasks to naturalistic paradigms, one might predict that  
21 naturalistic paradigms would also increase sensitivity to behavior. However, to our knowledge,  
22 this has not been directly tested. Furthermore, there has been relatively less work on how brain  
23 state affects connectivity-based predictions of traits outside the cognitive domain—for example,  
24 emotion and affect. Naturalistic tasks also raise the intriguing possibility of tailoring stimulus  
25 content to the construct to be predicted—for example, using a stimulus that evokes feelings of  
26 suspense or unease to predict trait or state anxiety, or one that evokes feelings of suspicion to  
27 predict paranoia (Finn et al., 2018).

28  
29 Here, we test the hypothesis that data collected during movie watching improves functional  
30 connectivity-based behavior prediction compared to data collected at rest. Using the Human  
31 Connectome Project 7T dataset, we demonstrate that trait scores derived from both cognitive and

1 emotion domains are more accurately predicted from movie-watching data, and that this advantage  
2 is unlikely to be driven by differences in low-level arousal or data quality between the two  
3 conditions. We show that in some cases, both cognition and emotion scores can be predicted from  
4 as little as two to three minutes of movie-watching data. Following this, we explore which clip  
5 features are associated with prediction accuracy, and find that clips high in social content, as well  
6 as those that evoke more variability in gaze position across subjects, tend to yield better  
7 predictions. We discuss how these results add to our basic understanding of trait-state interactions  
8 in functional connectivity, as well as their practical implications for large-scale efforts in brain-  
9 behavior predictive modeling.

10

## 11 **Results**

12

13 We used fMRI and behavioral data from 176 healthy subjects made available as part of the Human  
14 Connectome Project 7T dataset (Van Essen et al., 2013). Functional runs of interest included two  
15 resting-state runs and four movie-watching runs, each approximately 15 minutes in duration.  
16 While data were acquired in four separate sessions, we focused on the two sessions that contained  
17 movie-watching runs (first and fourth). For each subject, REST1, MOVIE1 and MOVIE2 were  
18 acquired together in that order in a single session (referred to here as “Session 1”), and REST4,  
19 MOVIE3 and MOVIE4 were acquired in that order in a separate session (“Session 2”) on the  
20 following day or two days later. During rest runs, subjects were instructed to keep their eyes open  
21 and maintain fixation on a central cross. During movie runs, subjects passively viewed a series of  
22 four or five video clips, each 1-4 minutes long. Video clips came from both independent and  
23 Hollywood films, and varied in their low-level (i.e., audiovisual features) and high-level properties  
24 (i.e., semantic content). For a brief description of each clip, see Table 1. For further details on  
25 imaging data acquisition, see Materials and Methods.

| Run    | Clip short name | Full-length film name (year)         | Duration (TRs) | Duration (min:sec) | Description                                                                                                                                       |
|--------|-----------------|--------------------------------------|----------------|--------------------|---------------------------------------------------------------------------------------------------------------------------------------------------|
| MOVIE1 | two men         | Two Men (2009)                       | 245            | 04:05              | A man sees another man run past him on a road in rural Australia and muses about his potential motives. Accented English dialogue plus subtitles. |
| MOVIE1 | bridgeville     | Welcome to Bridgeville (2011)        | 221            | 03:41              | People describe why they love living in small-town America; a collection of scenes from community life.                                           |
| MOVIE1 | pockets         | Pockets (2008)                       | 188            | 03:08              | Close-ups of people holding things they keep in their pockets and describing the items' significance.                                             |
| MOVIE1 | overcome*       | Inside the Human Body (2011)         | 63             | 01:03              | Inspirational montage of people who have overcome physical disabilities.                                                                          |
| MOVIE1 | testretest1*    | 23 Degrees South (2011); LXIV (2011) | 83             | 01:23              | Concatenation of brief (1-3 s) clips depicting a variety of people, objects, and scenes.                                                          |
| MOVIE2 | inception       | Inception (2010)                     | 228            | 03:48              | Two characters explore a dream world and learn its surprising physical and emotional characteristics.                                             |
| MOVIE2 | social net      | The Social Network (2010)            | 259            | 04:19              | Mark Zuckerberg's disciplinary hearing at Harvard and its aftermath (fictional portrayal).                                                        |
| MOVIE2 | ocean's 11      | Ocean's Eleven (2001)                | 250            | 04:10              | Danny Ocean and his accomplices meet to plot their Vegas casino heist.                                                                            |
| MOVIE2 | testretest2*    |                                      | 83             | 01:23              | (same as testretest1)                                                                                                                             |
| MOVIE3 | flower          | Off The Shelf (2008)                 | 180            | 03:00              | A flower escapes its pot and goes on a journey through the neighborhood.                                                                          |
| MOVIE3 | hotel           | 1212 (year unavailable)              | 185            | 03:05              | A man and woman have a metaphysical encounter in a hotel room.                                                                                    |
| MOVIE3 | garden          | Mrs. Meyer's Clean Day (2013)        | 203            | 03:23              | Documentary about an urban vegetable garden serving community needs.                                                                              |
| MOVIE3 | dreary          | Northwest Passage (year unavailable) | 143            | 02:23              | Montage of dreary landscapes and abandoned structures set to eerie music.                                                                         |
| MOVIE3 | testretest3*    |                                      | 83             | 01:23              | (same as testretest1)                                                                                                                             |
| MOVIE4 | home alone      | Home Alone (1990)                    | 234            | 03:54              | Main character walks through the house, realizing he is on his own.                                                                               |
| MOVIE4 | brokovich       | Erin Brockovich (2000)               | 231            | 03:51              | Erin Brokovich meets with a plaintiff and then visits a legal office with her young children in tow.                                              |
| MOVIE4 | star wars       | The Empire Strikes Back (1980)       | 255            | 04:15              | Scene from Rebel base on an icy planet; Leia and Han Solo argue.                                                                                  |
| MOVIE4 | testretest4*    |                                      | 83             | 01:23              | (same as testretest1)                                                                                                                             |

**Table 1. Description of individual video clips that comprised each of the four MOVIE runs.**

MOVIE1 and MOVIE3 contain clips from independent films freely available under a Creative Commons license; MOVIE2 and MOVIE4 contain clips from Hollywood films. \* indicates clip was not included in single-clip CPM analyses due to short length.

1  
2 The HCP makes available extensive phenotyping data for each subject. We were interested in how  
3 well functional connectivity during both rest and movies could predict trait behaviors in two  
4 broad domains: cognition and emotion. From the individual measures in each domain—many of  
5 which are highly correlated with one another—we derived a single score for each subject using the  
6 top component from a principal components analysis (one per domain). To avoid dependence  
7 between the training and test sets, principal components were learned using an independent set of  
8 subjects ( $n = 1,022$ ; those scanned only at 3T) and this transformation was applied once to all 7T  
9 subjects. See Fig. 1 for loadings of individual measures onto these components, and Tables S1 and  
10 S2 for full names and constructs for each measure. Briefly, higher scores on the first principal  
11 component in the cognitive domain (henceforth referred to as “cognition score”) were associated

1 with better performance on tasks measuring reading ability, vocabulary, and fluid intelligence (Fig.  
 2 1a); higher scores on the first principal component in the emotion domain (“emotion score”) were  
 3 associated with higher self-reported life satisfaction, emotional support, and positive affect, and  
 4 lower sadness and perceived stress (Fig. 1b). Cognition and emotion scores were not strongly  
 5 correlated across subjects ( $r_{174} = 0.11$ ,  $p = 0.13$ ; Fig. 1c), suggesting that the two domains are  
 6 largely independent. These two scores served as targets for connectivity-based prediction in the

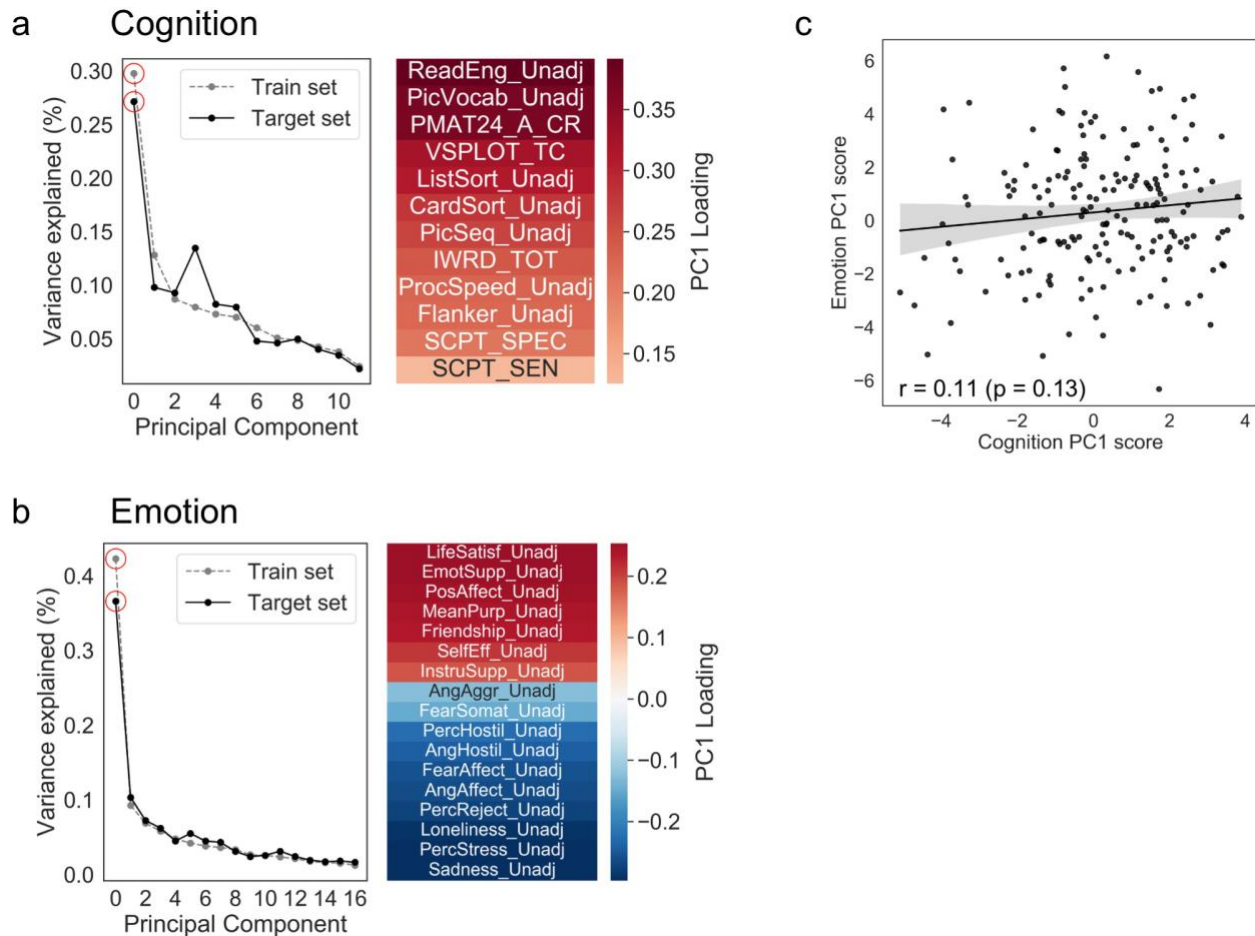

**Figure 1. Deriving cognition and emotion scores.** Principal components analysis (PCA) was performed on behavioral data from  $n = 1,022$  training subjects (those not scanned at 7T) using measures in the a) cognition and b) emotion domains, and then this learned transformation was applied to the target set of  $n = 176$  subjects in the 7T dataset to derive a cognition and emotion score for these subjects. In the cognition domain, the first principal component explained 30% and 27% of the variance in the training and target sets, respectively, and in the emotion domain, the first principal component explained 42% and 37% of the variance in the training and target sets (red circles on scree plots). The heatmaps show the loadings of individual measures onto the first component in each domain. c) Cognition and emotion scores were not significantly correlated across subjects in the target set, indicating that these two constructs are separable. See Tables S1 and S2 for full variable names and measured constructs for the variables entered into each PCA.



1 analyses that follow. At each cross-validation fold, prior to model training and testing, scores were  
2 residualized with respect to potentially confounding variables (head motion and time of day; see  
3 Methods and Supplemental Figs. 1 and 2).

#### 4 *Movie-watching outperforms rest for prediction of behavior traits*

6 Our main goal was to compare how well cognition and emotion scores could be predicted based  
7 on functional brain connectivity during rest or movie watching. REST runs were 900 TRs, or  
8 15:00, in duration, while MOVIE runs ranged from 769-800 TRs (12:49-13:20) following removal  
9 of rest periods between clips (see Methods). For each subject for each run, we created a whole-  
10 brain functional connectivity matrix by calculating the Pearson correlation of activity timecourses  
11 between each pair of nodes in a predefined 268-node atlas (Shen et al., 2013). We used  
12 connectome-based predictive modeling (CPM; Finn et al., 2015; Shen et al., 2017) to build and  
13 test models trained to predict an individual's behavioral score from their functional connectivity  
14 matrix. Briefly, CPM is a fully cross-validated approach in which a linear model is built to relate  
15 connectivity strength in selected features (i.e., connections, or "edges") to behavioral score within  
16 a training set, and then this model is applied to data from subjects in a test set to generate a  
17 predicted behavioral score. Here, we used 100 iterations of 10-fold cross-validation. Model  
18 accuracy was assessed using Spearman (rank) correlation between predicted and observed scores  
19 across all subjects, resulting in one accuracy ( $r_s$  value) for each of the 100 iterations.

21 Cognition scores could be predicted with significant accuracy from all four MOVIE runs (Fig. 2a):  
22 MOVIE1 (median  $r = 0.29$ , permutation-based  $p = 0.0009$ ), MOVIE2 ( $r = 0.41$ ,  $p = 0.0001$ ),  
23 MOVIE3 ( $r = 0.23$ ,  $p = 0.011$ ), and MOVIE4 ( $r = 0.17$ ,  $p = 0.048$ ), as well as from REST1 (median  
24  $r = 0.26$ ,  $p = 0.003$ ), but not from REST4 ( $r = 0.12$ ,  $p = 0.13$ ). Within the first session, prediction  
25 accuracy was higher for both MOVIE runs than for the REST runs (MOVIE1 versus REST1:  
26 Mann-Whitney U-test, effect size  $[f] = 0.79$ ,  $p < 10^{-12}$ ; MOVIE2 versus REST1,  $f = 1.0$ ,  $p < 10^{-34}$ ),  
27 and was higher for MOVIE2 than for MOVIE1 ( $f = 1.0$ ,  $p < 10^{-34}$ ). Similarly, within the second  
28 session, prediction accuracy was higher for both MOVIE runs than for the REST run (MOVIE3  
29 versus REST4:  $f = 0.97$ ,  $p < 10^{-31}$ ; MOVIE4 versus REST4:  $f = 0.84$ ,  $p < 10^{-17}$ ). Also within the  
30 second session, accuracy was higher for MOVIE3 than for MOVIE4 ( $f = 0.84$ ,  $p < 10^{-16}$ ).

31

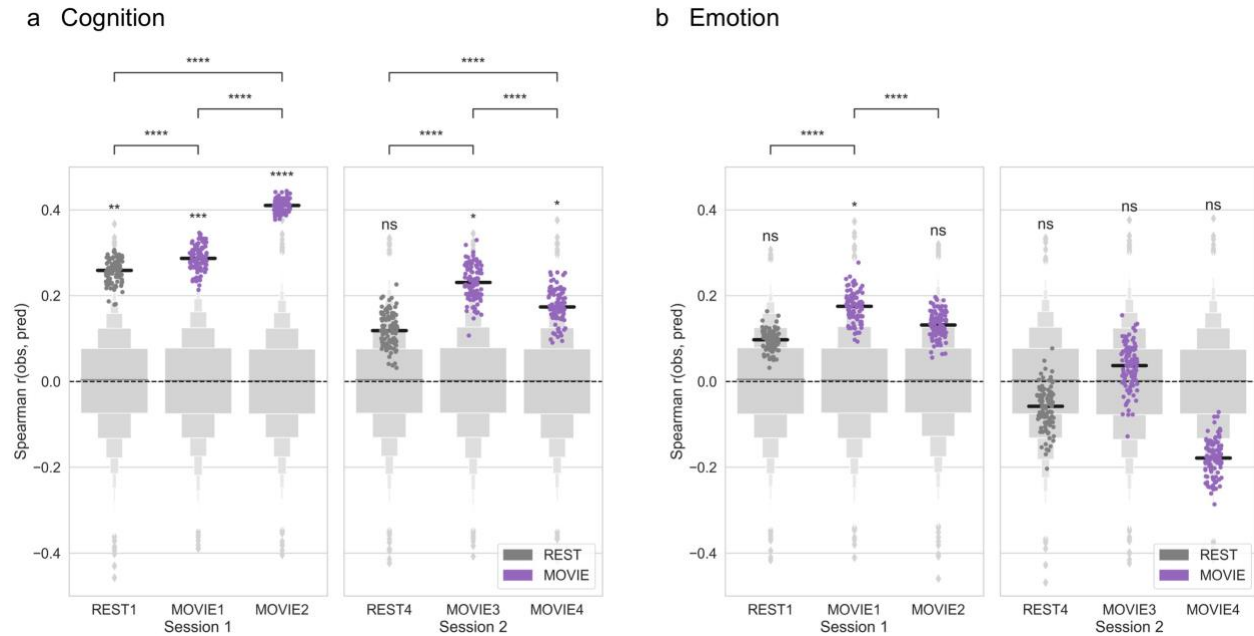

**Figure 2. Movie-watching outperforms resting state for functional connectivity-based prediction of behavior.** Connectome-based predictive models were trained to predict a) cognition or b) emotion score from resting-state (dark gray) or movie-based (purple) functional connectivity. Accuracy was measured as the Spearman [rank] correlation between predicted and observed scores (y axis). Dots show results from 100 iterations of 10-fold cross-validation (true models). Light gray boxen plots show null distribution from 10,000 permutations in which behavior scores and connectivity matrices were randomized across subjects. Black horizontal line denotes median accuracy for true models. Statistical significance for each run was calculated by comparing the median of the true models to the null distribution. Differences in accuracy between runs were assessed using Mann-Whitney U tests. ns:  $p > 0.05$ ; \* $p < 0.05$ ; \*\* $p < 0.01$ ; \*\*\* $p < 0.001$ ; \*\*\*\* $p < 0.0001$ .

1 Emotion scores, on the other hand, could only be predicted from MOVIE1 ( $r = 0.18$ ,  $p = 0.049$ ;  
 2 Fig. 2b). Predictions from REST1 and MOVIE2 did not reach significance, and none of the runs  
 3 in the second session gave significant predictions (all  $p > 0.1$ ). Prediction accuracy was higher for  
 4 MOVIE1 than for REST1 (Mann-Whitney U-test,  $f = 0.97$ ,  $p < 10^{-30}$ ). However, certain individual  
 5 clips in both MOVIE1 and MOVIE2 gave significant predictions of emotion scores, as described  
 6 in the section *Predictions based on individual clips* below.

7

8 *Advantage for movies is not due to low-level arousal*

9 Can the advantage for movies be explained by differences in arousal between the two states? In  
 10 other words, are people simply more likely to be drowsy or asleep during rest, leading to a drop in  
 11 prediction accuracy? To answer this question, we used eye-tracking data to compare three metrics



1 of alertness across the runs of interest: percentage of TRs with valid eye-tracking data (as a proxy  
2 for eyes-open time), blink rate, and median blink duration.

3  
4 Within session 1, the percentage of TRs with valid-eye tracking data was generally high  
5 (approximately 82 percent across all runs), and there were no significant differences in this metric  
6 between REST1 and MOVIE1 (paired t-test:  $t_{139} = -1.48$ ,  $p = 0.14$ ) or REST1 and MOVIE2 ( $t_{138}$   
7  $= -0.55$ ,  $p = 0.59$ ; Fig. 3a). Within session 2, percentages were also high (approximately 82-86  
8 percent). The percentage of TRs with valid data was slightly lower in REST4 than in MOVIE3  
9 ( $t_{143} = -2.17$ ,  $p = 0.03$ ), but there was no significant difference between REST4 and MOVIE4 ( $t_{144}$   
10  $= -1.16$ ,  $p = 0.25$ ; Fig. 3a).

11  
12 We next examined data on blinks. Subjects tended to blink less during REST runs than during  
13 MOVIE runs in session 1 (REST1 versus MOVIE1:  $t_{133} = -5.68$ ,  $p < 0.0001$ ; versus MOVIE2:  $t_{132}$   
14  $= -3.14$ ,  $p = 0.002$ ; Fig. 3b) and, to a lesser extent, session 2 (REST4 versus MOVIE3:  $t_{136} = -1.95$ ,  
15  $p = 0.05$ ; versus MOVIE4:  $t_{136} = -1.76$ ,  $p = 0.08$ ; Fig. 3b), and blinks were longer in duration  
16 during REST runs (REST1 versus MOVIE1:  $t_{133} = 4.0$ ,  $p < 0.0001$ ; versus MOVIE2:  $t_{132} = 2.79$ ,  
17  $p = 0.006$ ; REST4 versus MOVIE3:  $t_{136} = 3.1$ ,  $p = 0.003$ ; versus MOVIE4,  $t_{136} = 4.4$ ,  $p < 0.0001$ ;  
18 Fig. 3c). Increased blinking during movie-watching may be related to increased saccades, since  
19 blinks often accompany saccadic gaze shifts (Evinger et al., 1991). (Participants were instructed  
20 to fixate on a central crosshair during rest, while they were free to move their gaze naturally during  
21 movie watching.) However, blinks during rest runs were not so long as to imply that subjects were  
22 sleeping. “Microsleeps” are typically defined as an eye closure lasting longer than 1000 ms (1 s).  
23 In general, microsleeps were rare—the median number across subjects ranged from 10 (REST4)  
24 to 21 (MOVIE1)—and there were no differences in number of microsleeps between conditions  
25 (all  $p > 0.23$ ; Fig. 3d). See Fig. S4 for correlations between blink-related measures.

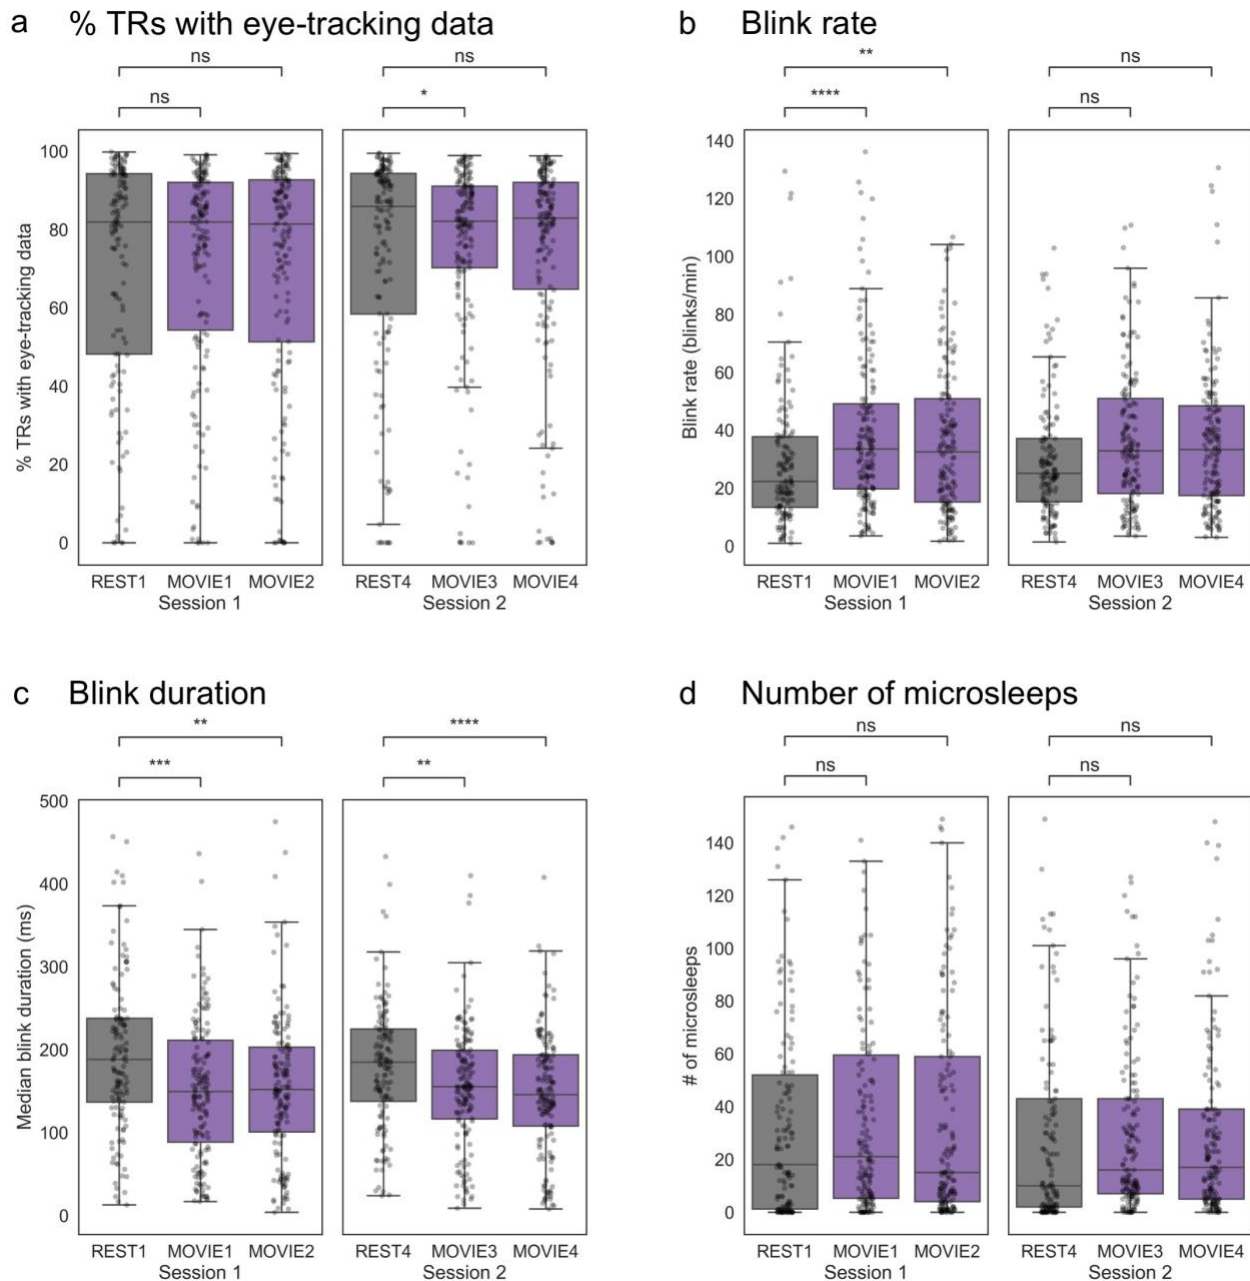

**Figure 3. Differences in eye-tracking-based measures between rest and movie runs.** Per-run distributions of four metrics are shown: a) percentage of TRs with valid eye-tracking data (a proxy for eyes-open time), b) blink rate, c) blink duration, and d) number of microsleeps (defined as blinks > 1 s in duration). In the box plots, the center line represents the median, while the box extent represents the interquartile range (IQR; 25<sup>th</sup> – 75<sup>th</sup> percentile). The whiskers extend to 1.5\*IQR. Individual-subject data are overlaid as semi-transparent dots. Note that data are inherently paired (with subject as the repeated measure), but are not displayed as such for reasons of visual clarity. However, all between-run comparisons were conducted using paired t-tests on subjects with data available for both scans in a given pair. n.s., not significant ( $p > 0.05$ ); \* $p < 0.05$ ; \*\* $p < 0.01$ ; \*\*\* $p < 0.001$ ; \*\*\*\* $p < 0.0001$ .

1 Despite the differences between rest and movie-watching, blink rate and duration were consistent  
2 with typical wakeful ranges during both states. Median blink rate across subjects ranged from 22.3  
3 (REST1) to 33.4 (MOVIE1) per minute, which falls within previously published values for  
4 spontaneous blink rates (e.g., Bentivoglio et al., (1997), 6-40 per minute; Karson et al. (1983): 23  
5  $\pm$  15 per minute). Median blink duration ranged from 155.5 ms (MOVIE1) to 188.0 ms (REST1),  
6 again falling within the typical reported range for the alert state, which is 100-400 ms. Thus,  
7 despite some differences in blink patterns, there was no strong evidence that major differences in  
8 arousal across conditions are responsible for the observed differences in prediction accuracy.

9

### 10 *Anatomy of predictive networks differs across states*

11 We next examined which functional connections were most important to the predictive models,  
12 and whether these differed across states. (Because only MOVIE1 gave significant predictions of  
13 emotion score, we restricted these analyses to cognition score to permit comparisons across runs.)  
14 Restricting our analysis to connections, or edges, that were selected in at least 90 percent of model  
15 iterations, we found significant overlap between nearly all pairs of runs (Fig. 4a), but overlap was  
16 higher for runs of the same state than across states (mean overlap within- and across-state,  
17 respectively: 36 and 14 edges, p value for difference = 0.0007 according to a Mann-Whitney U  
18 test; visible as two distinct clusters in Fig. 4a). This suggests that while some edges are always  
19 associated with behavior regardless of state, there is more consistency in the edges associated with  
20 behavior within a given state, even across runs and scan sessions.

21

22 Next, we visualized the most consistently selected edges in two ways: first, by displaying  
23 individual nodes in brain space according to their numbers of positive and negative edges (Fig.  
24 4b), and second, by summarizing positive and negative networks by macroscale brain region (i.e.,  
25 lobe; Fig. 4c). (Note that here, “positive” and “negative” refer to the sign of an edge’s association  
26 with behavior, not to its raw correlation strength.) As is typical of a data-driven approach,  
27 predictive networks were widely distributed across the brain, with no single dominant anatomical  
28 pattern. However, some trends emerged. Stronger connectivity between prefrontal and occipital  
29 cortex predicted higher cognition score in both rest runs, and to some extent in the session 2 movie  
30 runs (i.e., MOVIE3 and MOVIE4), but were less important in the session 1 movie runs (i.e.,

- 1 MOVIE1 and MOVIE2). Temporal-occipital connectivity was strongly negatively associated with
- 2 cognition score in MOVIE2, but played a much lesser role in predictive networks in the other runs.

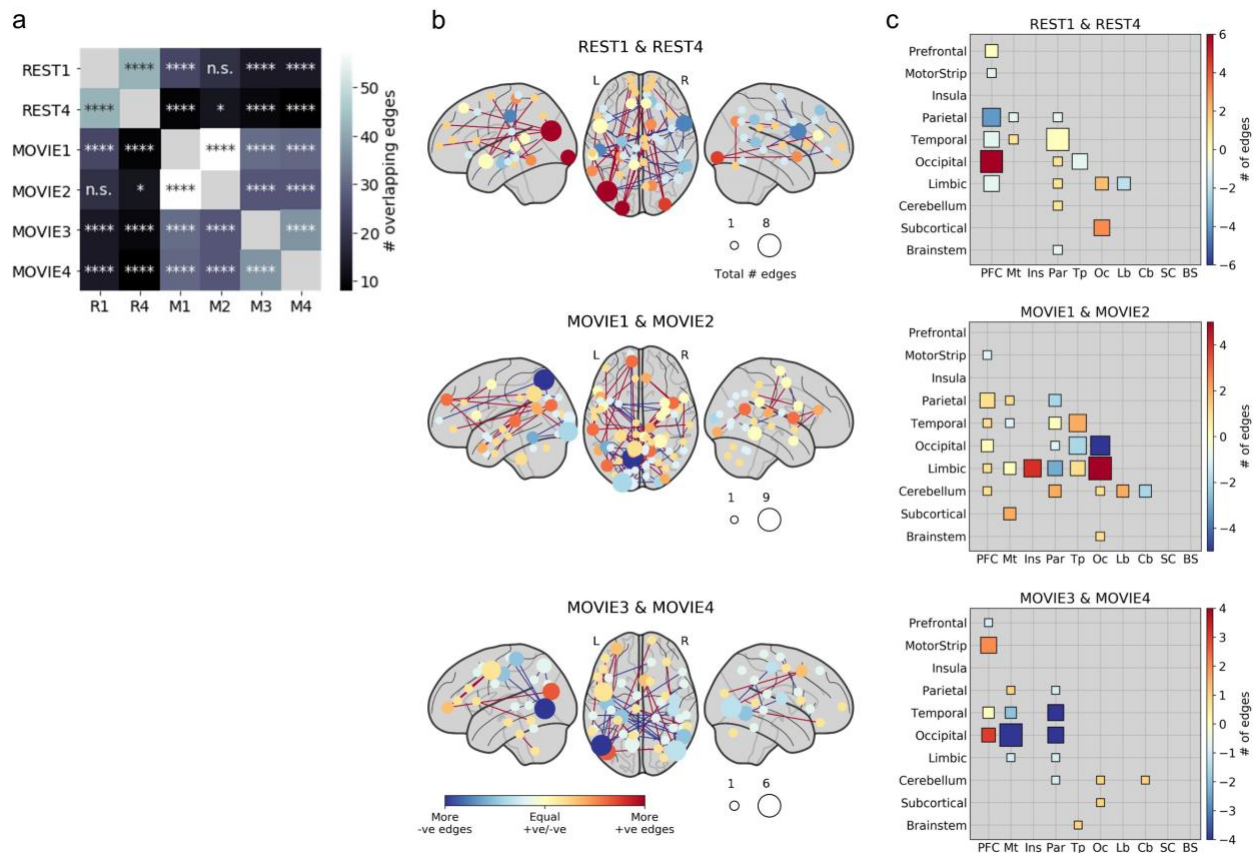

**Figure 4. Anatomy of predictive networks across states.** a) Overlap between most consistent edges (i.e., those selected in at least 90% of all model iterations) across runs. Significance of overlap was assessed with the hypergeometric cumulative distribution function. n.s., not significant ( $p > 0.05$ ); \* $p < 0.05$ ; \*\* $p < 0.01$ ; \*\*\* $p < 0.001$ ; \*\*\*\* $p < 0.0001$  (Bonferroni corrected). Overlap was higher within states than across states (Mann-Whitney U test,  $p = 0.0007$ ). b) Nodewise visualization of most consistently selected edges across pairs of runs of the same state (REST or MOVIE). Nodes are sized according to the sum of edges in the positive and negative networks (such that larger nodes had more edges overall), and colored according to the difference between edges in the positive and negative networks (such that red nodes had mostly positive edges and blue nodes had mostly negative edges). “Positive” refers to edges positively correlated with behavior, while “negative” refers to edges inversely correlated with behavior. c) Lobewise visualization of most consistently selected edges across pairs of runs. Size and color scheme are similar to (b). Diagonal depicts within-lobe connections. PFC, prefrontal cortex; Mt, motor strip; Ins, insula; Par, parietal; Tp, temporal; Oc, occipital; Lb, limbic; SC, subcortical; BS, brainstem.

1 The individual nodes with the most connections in predictive networks also differed across states  
2 and sessions. At rest, a node in left visual association cortex (Brodmann's area 19) had the highest  
3 total edges, most of them involving prefrontal cortex and positively associated with cognition  
4 score. In the session 1 movie runs, nodes in left parietal cortex (BA 7) and left visual association  
5 cortex (BA 18) had the highest total edges, most of them negatively related to cognition score. In  
6 the session 2 movie runs, two nearly homologous nodes in left and right visual association cortex  
7 had the highest total edges, many of them negatively related to cognition score. Overall, nodes in  
8 visual association regions seemed to play an outsize role in predictive networks, though their  
9 connection partners and the sign of their association with behavior changed depending on brain  
10 state and session. Of note, for the movie runs, it is difficult to disentangle cross-session variability  
11 (noise) from effects of stimulus content on selected edges, since each run contained a different set  
12 of clips. In the following section, we perform prediction based on single video clips to explore  
13 how stimulus content affects prediction accuracy and anatomy of predictive networks.

14

#### 15 *Predictions based on individual clips*

16 To explore if and how prediction success varies across stimuli, we tested how well behavioral  
17 scores could be predicted from functional connectivity during single video clips. Clips varied in  
18 duration from 1:03 to 4:19 min:sec, and previous work has shown that longer acquisitions improve  
19 estimation of individual signal (Laumann et al., 2015; Noble et al., 2017). For an unbiased  
20 comparison across clips, we truncated all clip timecourses to match the duration of one the shortest  
21 clips (143 TRs, or 2:23) and constructed clip-specific functional connectivity matrices for all  
22 subjects. We then performed CPM using data from each clip individually to predict cognition or  
23 emotion score.

24

25 Despite the limited amount of data, several clips yielded significant predictions of behavior (Fig.  
26 5). Cognition scores could be predicted using data from 9 out of 13 clips (“two men”: median  $r =$   
27 0.18, [ $p = 0.047$ ]; “pockets”: 0.22 [0.017]; “inception”: 0.22 [0.02]; “social net”: 0.38 [0.0001];  
28 “ocean’s 11”: 0.34 [0.0003]; “garden”: 0.18 [0.04]; “home alone”: 0.20 [0.03]; “brokovich”: 0.19  
29 [0.04]; “star wars”: 0.21 [0.02]; Fig. 5a). Emotion scores could be predicted using data from 3 out  
30 of 13 clips (“pockets”: median  $r = 0.22$ ,  $p = 0.013$ ; “social net”: 0.24 [0.01], and “oceans”:



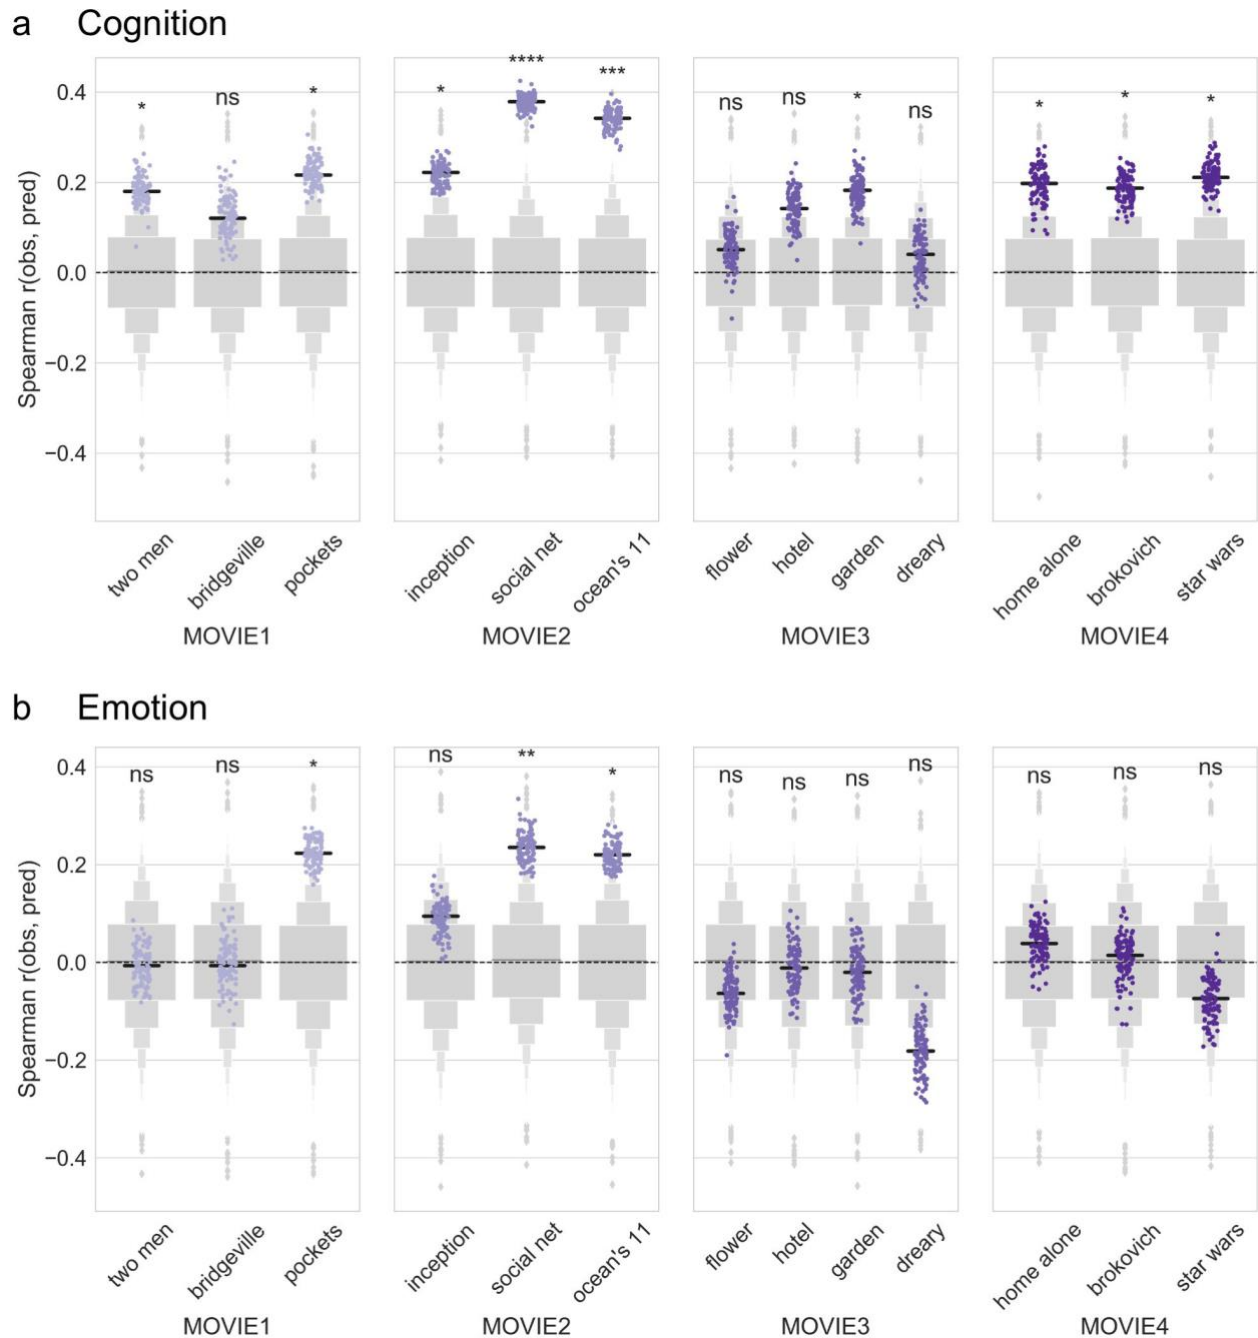

**Figure 5. Predictions based on individual video clips.** Connectome-based predictive models were trained to predict a) cognition or b) emotion score from individual video clips (x axis) in each of the four movie runs. Accuracy was measured as the Spearman [rank] correlation between predicted and observed scores (y axis). Dots show results from 100 iterations of 10-fold cross-validation (true models). Light gray boxen plots show null distribution from 10,000 permutations in which behavior scores and connectivity matrices were randomized across subjects. Black horizontal line denotes median accuracy for true models. Statistical significance was calculated by comparing the median of the true models to the null distribution. ns:  $p > 0.05$ ; \* $p < 0.05$ ; \*\* $p < 0.01$ ; \*\*\* $p < 0.001$ ; \*\*\*\* $p < 0.0001$ .



1 0.22 [0.01]; Fig. 5b). Similar to the full runs, prediction was overall better for cognition scores  
2 than emotion scores; as expected given the whole-run results, no individual clips in MOVIE3 or  
3 MOVIE4 yielded significant predictions of emotion score.

4  
5 We also assessed prediction success for individual clips by comparing accuracies from each clip  
6 to a matched block of resting-state data from the REST run in the same session. (For example, the  
7 clip “pockets” began at 8:46 into the MOVIE1 run, so its corresponding matched rest block was  
8 taken from data beginning at 8:46 into the REST1 run. As above, data was matched for duration  
9 at 2:23 min:sec, or 143 TRs.) Overall, 10 and 9 clips (out of 13) outperformed their matched rest  
10 block for prediction of cognition and emotion score, respectively (Fig. S3).

11  
12 We next asked whether high-performing clips were consistent across domains. In other words, if  
13 a clip performs well for predicting cognitive score, does it also perform well for predicting emotion  
14 score? We correlated median prediction accuracy for cognitive and emotion scores across clips,  
15 restricting our analysis to clips in the first session (MOVIE1 and MOVIE2, since no clips in the  
16 second session yielded accurate predictions of emotion score). Prediction accuracies were  
17 correlated at  $r_s = 0.83$  ( $p = 0.04$ ), indicating that the same clips were most successful for both the  
18 cognitive and emotion domains (Fig. 6a).

19  
20 For the most successful clips, are the same edges selected for both the cognitive and emotion  
21 predictive models, or do the informative edges differ by domain? To answer this, we assessed the  
22 overlap between the consistently selected edges in the cognition and emotion models in the two  
23 clips that performed best for both domains, Ocean’s 11 and Social Network. Models trained to  
24 predict the same behavior from different clips had more overlapping edges than models trained on  
25 the same clip to predict different behaviors (Fig. 6b). In other words, similar networks were  
26 selected to predict cognitive score from both Ocean’s 11 and Social Network (overlap depicted in  
27 Fig. 6c, left panel), but different networks were selected to predict emotion score (overlap depicted  
28 in Fig. 6c, right panel). Therefore, the same clip may perform well across domains, but different  
29 edges may be important to the model in each particular domain.

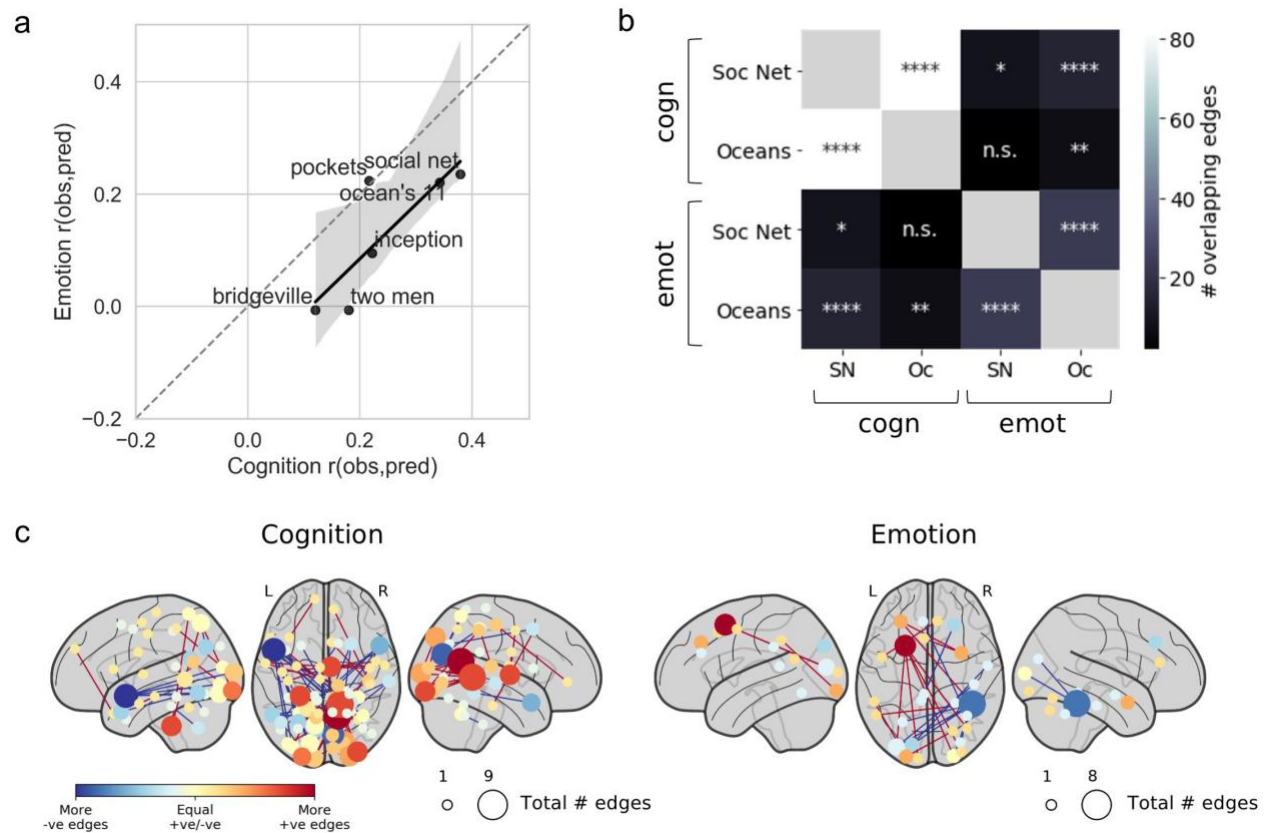

**Figure 6. Stimulus- and domain-specificity of predictions.** a) Correlation between a clip's median prediction accuracy for cognitive score ( $x$  axis) and emotion score ( $y$  axis), limited to clips acquired in session 1 (since no clips in session 2 gave significant predictions of emotion score). Spearman  $r = 0.83$  ( $p = 0.04$ ). b) Overlap between consistently selected edges across the two most successful clips (inner label) and domains (outer label). SN, social net; Oc, ocean's 11. c) Nodewise visualization of consistently selected edges across same two clips in each domain (cognition and emotion). Nodes are sized and colored as in Fig. 4. ns:  $p > 0.05$ ; \* $p < 0.05$ ; \*\* $p < 0.01$ ; \*\*\* $p < 0.001$ ; \*\*\*\* $p < 0.0001$ .

### 1 *Stimulus features related to prediction accuracy*

2 Which clip features are associated with more accurate predictions? Understanding how clip  
 3 content relates to prediction accuracy can shed light on why certain clips are more successful than  
 4 others, which may help guide stimulus selection for future studies. (For these analyses, we again  
 5 restricted our analyses to predictions of cognitive score because too few clips gave significant  
 6 predictions of emotion score to draw conclusions.)

7

8 We first used semantic category labels available for each clip that were created by hand using the  
 9 WordNet semantic taxonomy (Huth et al., 2012) and made available as part of the HCP dataset.

1 These annotations contains 859 distinct object (noun) and action (verb) categories. Using partial  
2 least-squares regression, we identified one component of these labels that explained 96 percent of  
3 the variance in median prediction accuracy across clips (Fig. 7a). Categories with strong positive  
4 loadings on this component (associated with better prediction accuracy) included verbs such as  
5 “act” and “talk”, as well as nouns such as “person” and “causal agent”. Categories with strong  
6 negative loadings (associated with worse prediction accuracy) were largely nouns rather than  
7 verbs, and included objects associated with scenes or landscapes (e.g., “mammal”, “telephone  
8 pole”, “building material”, “vegetation”). This suggests that clips with more humans, verbal  
9 interaction, and social information yield better behavioral prediction than clips containing mostly  
10 nature scenes and less social content.

11  
12 In another analysis, we used automated feature extraction (McNamara et al., 2017) to create  
13 additional annotations of both low- and high-level features for each clip. Low-level features  
14 included brightness (luminance), optical flow (amount of frame-to-frame visual motion), and audio  
15 power (root-mean square of sound signal amplitude). To test the hypothesis arising from the  
16 WordNet semantic analysis that social content is associated with better prediction, we also labeled  
17 clips for the presence of human faces. We then summarized these properties for each clip using  
18 both mean and standard deviation across TRs (for low-level features) and number of TRs  
19 containing at least one face (for the high-level face feature) and correlated these with median  
20 prediction accuracy (Fig. 7b, 7c). Of the low-level features, only brightness standard deviation was  
21 significantly correlated with prediction accuracy, such more variance in brightness level across  
22 clip frames was associated with lower prediction accuracy ( $r = -0.87$ , Bonferroni corrected  $p =$   
23  $0.0008$ ). As predicted, number of TRs containing at least one face was positively correlated with  
24 median prediction accuracy ( $r = 0.76$ ,  $p = 0.003$ ). However, note that some of these features were  
25 also correlated with one another (Fig. S5); number of faces was strongly negatively related to  
26 brightness standard deviation ( $r = -0.77$ ), making it difficult to attribute unique variance in  
27 prediction accuracy to either feature.

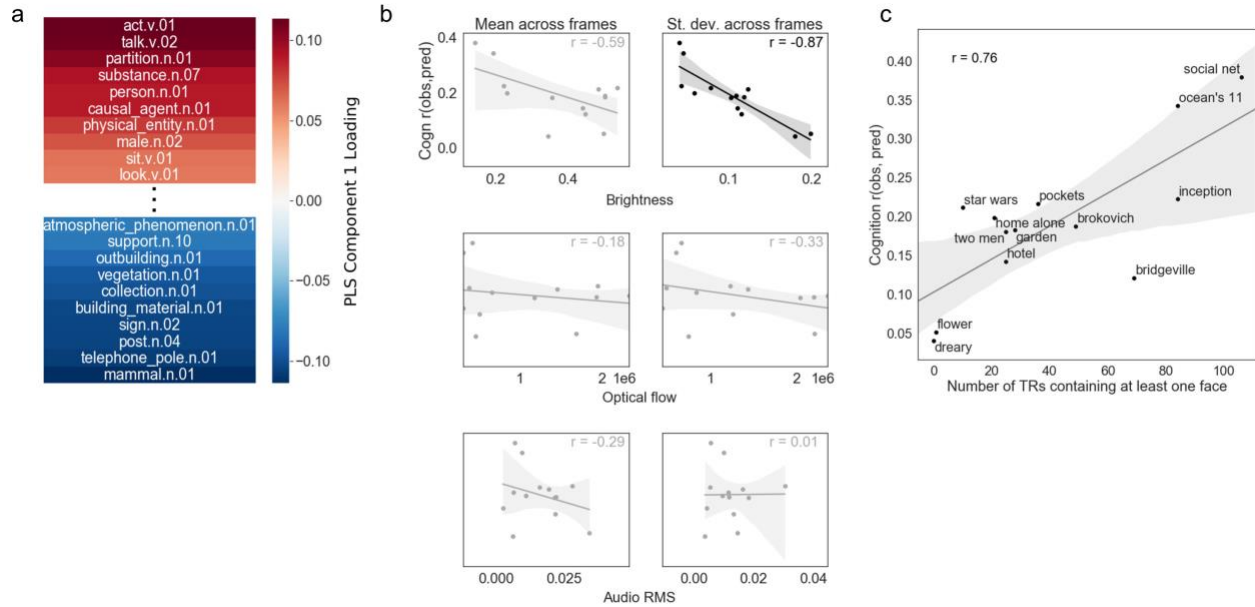

**Figure 7. Stimulus features related to prediction accuracy.** a) First component from a partial least squares regression relating semantic content to prediction accuracy for cognition score across video clips. Positive weights (red) are associated with better accuracy, while lower weights (blue) are associated with worse accuracy. b) Correlations between prediction accuracy for cognition score (y axis) and low-level audiovisual features (x axis; from top to bottom row: brightness [luminance], optical flow [between-frame motion], and audio RMS [volume]). Left column is mean across video frames, right column is standard deviation across video frames. Following correction, the only significant relationship was with brightness standard deviation, such that less variance in brightness across a clip was associated with better accuracy ( $r = -0.87$ , corrected  $p = 0.0008$ ). c) Correlation between number of TRs containing at least one face onscreen (a proxy for social content) and prediction accuracy for cognition score (y axis): ( $r = 0.76$ ,  $p = 0.003$ ).

- 1 *Cross-subject variance in gaze location is associated with better prediction*
- 2 One possibility is that participant engagement mediates the relationships between stimulus features
- 3 and prediction success. In other words, if clips with more social content are simply more engaging,
- 4 these clips may yield more accurate predictions because they evoke richer cognitive states and/or
- 5 standardize arousal levels across subjects. In the absence of explicit ratings of engagement or
- 6 behavioral proxies (e.g., debrief questionnaires or comprehension questions), how might we
- 7 measure engagement? We reasoned that one index of engagement might be synchrony of gaze
- 8 location, such that more engaging clips would evoke more similar patterns of eye movements
- 9 across subjects. To test this hypothesis, for each individual clip, we used eye-tracking data to create
- 10 gaze-position inter-subject correlation (ISC) matrices by correlating horizontal gaze location
- 11 across time between each pair of subjects. We then correlated the median gaze-ISC value with
- 12 cognition prediction accuracy across clips.

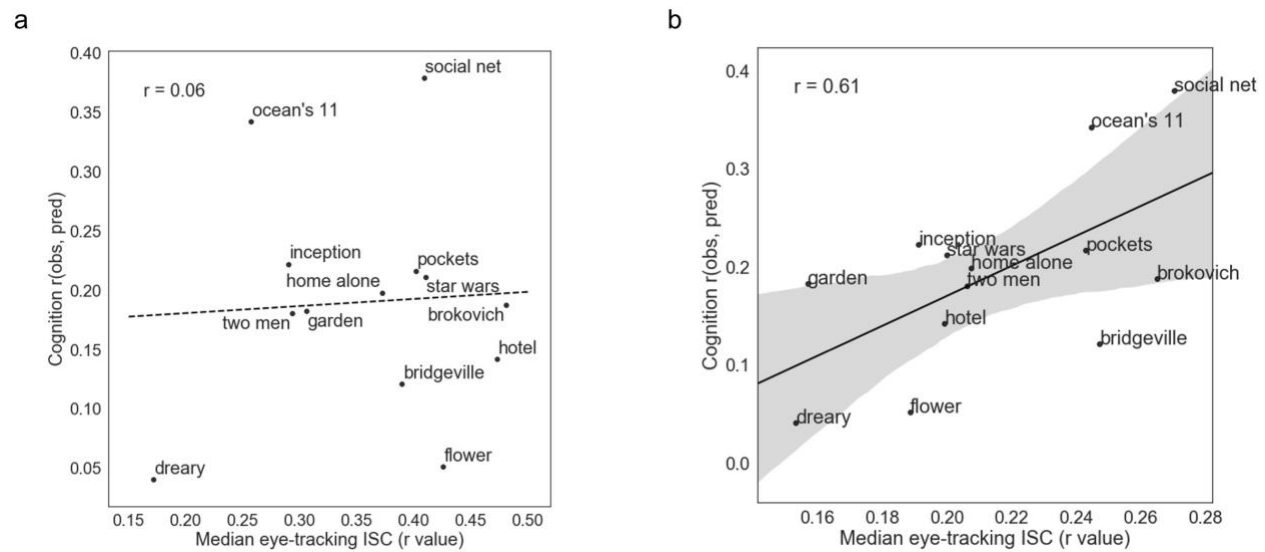

**Figure 8. Cross-subject variance in gaze position is associated with better prediction.**

Relationships across clips between prediction accuracy for cognition score (y axis) and measures of inter-subject correlation (ISC) in horizontal gaze position across subject pairs (x axis). While there was no significant relationship between median gaze position ISC and accuracy (a), higher accuracy was associated with higher standard deviation of gaze position ISC (b), suggesting that the most successful clips are those that evoke the most variability in gaze trajectories across subjects.

- 1 Contrary to our hypothesis, median gaze ISC was not correlated with prediction accuracy ( $r_{11} =$
- 2  $0.06$ ,  $p = 0.85$ ; Fig. 8a). However, standard deviation of gaze ISC was correlated with prediction
- 3 accuracy ( $r_{11} = 0.61$ ,  $p = 0.03$ ; Fig. 8b), meaning that clips that evoked more variable patterns of
- 4 eye movements across participants were better predictors. Standard deviation of gaze ISC was not
- 5 strongly correlated with number of TRs with faces onscreen ( $r_{11} = 0.32$ ,  $p = 0.28$ ), suggesting that
- 6 these two factors related to prediction accuracy are at least partially dissociable.
- 7
- 8 Cross-subject variance in gaze trajectory may lead to higher prediction accuracy if there is a
- 9 relationship between gaze trajectory, functional connectivity, and trait scores. In other words,
- 10 subjects who are more similar in their eye movements may also be more similar in their functional
- 11 connectivity, and if these pairs of subjects are also more similar in their trait scores, this might
- 12 explain why clips that evoke higher gaze variance are better predictors: they emphasize similarities
- 13 between specific pairs of subjects, rather than indiscriminately boosting similarity across all pairs.
- 14 The relationships among gaze trajectory, functional connectivity, and trait-like phenotypes—and

1 whether certain types of content elicit more variance in gaze trajectory across subjects—should be  
2 investigated in future work.

3

#### 4 **Discussion**

5

6 Here, we demonstrated that functional connectivity during movie watching outperforms rest for  
7 predicting trait-like behavioral scores in both the cognitive and emotional domains. There was no  
8 evidence that this effect was driven by differences in overall alertness across states, suggesting  
9 that the advantage for movies may stem from a shift in ongoing mental processes rather than low-  
10 level arousal changes. Within movie runs, several individual video clips gave successful  
11 predictions of trait scores based on only ~2.5 minutes of data. The best-performing clips were  
12 those with strong social content (i.e., humans, faces, dialogue), and also tended to evoke more  
13 variability in gaze trajectory across subjects. These results have implications for our basic  
14 understanding of trait-state interactions in relationships between functional connectivity and  
15 behavior, and for practical considerations related to future data collection efforts aimed at  
16 predictive modeling of behavior. We discuss these in turn below.

17

18 In general, prediction was more successful for the cognitive domain than the emotion domain. This  
19 result is perhaps not surprising in the context of prior work, as many studies have demonstrated  
20 successful prediction of cognitive ability—most typically, fluid intelligence and/or working  
21 memory—from functional connectivity using the HCP dataset (Smith et al., 2013; Finn et al.,  
22 2015; Hearne et al., 2016; Ferguson et al., 2017; Greene et al., 2018; Li et al., 2019) and other  
23 datasets (Hampson et al., 2006; van den Heuvel et al., 2009; Cole et al., 2012; Greene et al., 2018;  
24 Li et al., 2019), but there are comparatively fewer reports of functional connectivity predicting  
25 emotional or affective traits out-of-sample, and accuracies tend to be lower for these traits (Kong  
26 et al., 2019). One major difference is that the measures comprising the cognition score were  
27 performance-based, while those comprising the emotion score were self-reported. Self-report  
28 measures can suffer from bias, and may be less biologically valid than task performance. Ongoing  
29 efforts to develop behavior-based computational phenotypes for emotional and affective traits  
30 (Montague et al., 2012; Patzelt et al., 2018) may lead to measures that are more biologically valid  
31 and therefore more readily predicted from functional connectivity data. Another possibility that



1 does not appeal to construct validity is that these measures simply do not have robust correlates in  
2 static functional brain connectivity, but rather in other properties of brain structure or function.  
3 Still, we observed significant predictions of emotion score using data from one movie run  
4 (MOVIE1) and three individual clips (interestingly, two of which were from a different run,  
5 MOVIE2) but not from any resting run. This underscores the heightened sensitivity of movie-  
6 watching connectivity to even hard-to-predict measures, and suggests that stimulus content may  
7 be particularly important for successful emotion prediction.

8  
9 Why does functional connectivity during movies yield better predictions of trait behaviors than  
10 functional connectivity during rest, and why might certain movies—i.e., those with strong social  
11 content—perform better than others? Differences in model accuracy using different states (i.e.,  
12 rest versus movie-watching) and stimuli (i.e., different clips) to predict the same target behaviors  
13 suggests that there are trait-state interactions at play, such that movies, and certain movies in  
14 particular, enhance individual differences in behaviorally relevant connections. Previous work has  
15 investigated how movie-watching and other naturalistic paradigms affect functional connectivity,  
16 with reports that relative to rest, movie-watching alters how activity propagates across cortical  
17 pathways (Gilson et al., 2018), especially within and between regions related to audiovisual  
18 processing and attention (Betti et al., 2013; Demirtaş et al., 2019), and pushes the network  
19 community structure into an overall less modular and more integrated state (Betzel et al., 2020).  
20 However, it is not clear whether and how these modulations are related to behavioral variability  
21 across subjects. In other words, is this reorganization more pronounced in individuals at one end  
22 of the phenotypic spectrum, hence the increased sensitivity to trait-level differences for movies?  
23 Future work should relate movie-induced changes in individual edge strengths (using, for example,  
24 the approach taken by Greene et al. (2020)) and/or network-level properties to behavior, to better  
25 understand why and how movie watching boosts sensitivity to phenotypic differences.

26  
27 How might we interpret the success of social videos in particular? The relationship between a  
28 video's social content (proxied by number of faces onscreen) and its success in predicting  
29 cognition score is intriguing, given that this score is comprised of tests of fluid intelligence,  
30 working memory, and other constructs that are not explicitly social in nature. Broadly speaking,  
31 this fits with the social brain hypothesis that the human brain and its myriad cognitive advances

1 chiefly evolved to handle increasingly complex social structures (Dunbar, 1998). One possibility  
2 is that social videos are simply more engaging, and therefore more effective at corralling subjects  
3 into a similar brain state, reducing noise and enhancing behaviorally relevant signal among any  
4 remaining differences. However, if this were the case, we might expect gaze trajectories to also be  
5 more similar across subjects in the most successful videos (reflecting shared attention and  
6 processing), and this was not what we found. Instead, more successful videos tended to have more  
7 variability in gaze trajectories, such that some pairs of subjects were highly synchronized while  
8 others were dissimilar. Perhaps the most successful videos are those that engage people in different  
9 ways, and social content is the most likely to evoke different reactions and interpretations across  
10 subjects (Finn et al., 2018; Chen et al., 2019; Gruskin et al., 2019; Nguyen et al., 2019). Future  
11 work using online or post-hoc measures of stimulus engagement and interpretation could further  
12 explore this possibility.

13  
14 The most successful clips were from *Inception*, *The Social Network*, and *Ocean's 11*, which are  
15 all relatively recent and well-known Hollywood films. This could have conferred additional  
16 advantages for at least two reasons (not necessarily mutually exclusive with those presented  
17 above). First, many participants might have seen these films in their entirety prior to the scan  
18 session, meaning they would have been able to place the short clip into a larger context that may  
19 have evoked richer mental representations during viewing compared to an unfamiliar film.  
20 (Participants were not asked whether they had seen any of the films previously, but future studies  
21 should include this information in debriefing so that these effects can be studied and/or controlled  
22 for.) Second, the film industry, and Hollywood-style films in particular, generally gets better over  
23 time at using cinematographic techniques to capture audience's attentions and emotions, boosting  
24 engagement (Cutting et al., 2011). Both of these are important factors to consider in designing  
25 future studies.

## 26 27 *Limitations*

28 Our study has several limitations worth noting. First, we used a single group parcellation to define  
29 nodes. If individual subjects' functional anatomies are misaligned to this parcellation, it could bias  
30 measurements of functional connectivity (Bijsterbosch et al., 2018). Individual- and/or state-  
31 specific parcellations (Salehi et al., 2020) could capture additional variance in trait scores (Kong

1 et al., 2019) and/or improve accuracy of CPM-based predictions. (However, we note that this  
2 parcellation was defined on resting-state data, which if anything should bias results in favor of rest  
3 over movie-watching, and thus work against our hypothesis.) Second, we investigated only one  
4 prediction algorithm, connectome-based predictive modeling (Shen et al., 2017). While we chose  
5 CPM because it provides a good balance of accuracy, computational tractability, and  
6 interpretability, and to be consistent with prior work from our group and others, future work should  
7 investigate if other algorithms improve prediction accuracies overall and/or for one condition over  
8 another. A third limitation concerns preprocessing choices and potential confounding effects.  
9 While we chose to work with the HCP-provided FIX-denoised data with the addition of global  
10 signal regression (since this step boosts associations between connectivity and behavior (Li et al.,  
11 2019)), it is possible that other preprocessing choices might influence overall accuracy and/or the  
12 pattern of results. Similarly, while we attempted to control for collinearity between target  
13 behaviors and known confounds (head motion, time of day), it is always possible that insidious  
14 effects persist and bias predictions (Siegel et al., 2016).

15  
16 Finally, perhaps the biggest limitations stem from experimental design and data collection for this  
17 study, which was not necessarily designed to test these hypotheses. The order of video clips within  
18 runs as well as the order of runs themselves were not counterbalanced, raising the possibility that  
19 runs and/or clips in session 2 (which was actually the fourth session in the overall protocol)  
20 performed worse for prediction simply due to fatigue effects and not differences in clip content.  
21 Within a session, the rest run was always collected before movie runs (though we note again that  
22 if anything this is likely to work against our hypothesis, as fatigue generally increases and  
23 compliance decreases over the course of an imaging session). Video clips were not explicitly  
24 selected to cover a broad space of low-level and high-level features, and as such, there is less range  
25 in clip content than might be desired. (For example, most clips come from Hollywood or  
26 documentary-style films and contain predominantly social content; most of the clips that buck this  
27 trend—i.e., those with predominantly nature scenes and/or little or no dialogue—were confined to  
28 a single run, MOVIE3.) Future work should be deliberate in selecting stimuli that vary along  
29 certain dimensions of interest and counterbalancing order to provide a clearer picture of how  
30 stimulus content affects prediction accuracy.

31

1 *Implications for future work*

2 In spite of these limitations and outstanding questions, we believe that the results presented here  
3 should encourage more widespread adoption of naturalistic paradigms for studies of brain-  
4 behavior relationships. Large-scale data collection efforts might consider including a movie-  
5 watching condition in addition to, or perhaps even instead of, resting state. Beyond improving  
6 subject compliance, naturalistic paradigms seem to enhance meaningful individual variability in  
7 functional connectivity, akin to a “stress test” for the brain (Dubois and Adolphs, 2016; Finn et al.,  
8 2017). This may hasten development of biomarkers with real-world applications (Eickhoff et al.,  
9 2020).

10

11 Of the myriad potential ways to analyze data from naturalistic paradigms, we restricted our  
12 approach here to functional connectivity because it can be applied equally to both resting-state and  
13 movie-watching data, providing a straightforward way to test for differences between conditions.  
14 However, analyses that exploit the presence of a time-locked “ground truth” in naturalistic  
15 paradigms, such as inter-subject representational similarity analysis (Finn et al., 2020), an  
16 extension of the inter-subject correlation family of approaches (Hasson et al., 2004; Nastase et al.,  
17 2019), might prove even more sensitive to trait-level variability in both normative (van Baar et al.,  
18 2019) and clinical populations (Hasson et al., 2009; Salmi et al., 2013; Byrge et al., 2015; Bolton  
19 et al., 2018; Salmi et al., 2020). Because these and other activation-based approaches allow us to  
20 interpret spatiotemporal activity patterns in the context of stimulus features, they open the door to  
21 models that are not only predictive (*what* are the relationships between brain function and  
22 behavior), but also deepen our understanding of *how* and *why* individuals show distinct brain  
23 responses to the same information, and how this relates to trait-level phenotypes.

1 **Acknowledgments**

2 Data were provided by the Human Connectome Project, WU-Minn Consortium (Principal  
3 Investigators: David Van Essen and Kamil Ugurbil; 1U54MH091657) funded by the 16 NIH  
4 Institutes and Centers that support the NIH Blueprint for Neuroscience Research; and by the  
5 McDonnell Center for Systems Neuroscience at Washington University. This work utilized the  
6 computational resources of the NIH HPC Biowulf cluster (<http://hpc.nih.gov>), and was supported  
7 by the National Institutes of Health (grants K99MH120257 and R00MH120257 to E.S.F. and  
8 ZIAMH002783 to P.A.B.).

9

10 **Data and code availability**

11 Original MRI and behavioral data are publicly available via the Human Connectome Project. Data  
12 derivatives (e.g., nodewise timeseries) and code used to conduct the analyses and generate the  
13 figures in this manuscript are publicly available in the following repository:  
14 [https://github.com/esfynn/movie\\_cpm](https://github.com/esfynn/movie_cpm)

## 1 **Methods**

2

### 3 **Data**

#### 4 *Subjects*

5 All data used here come from the Human Connectome Project (HCP) 7T release. A total of 184  
6 subjects were scanned at 7T; these were a subset of the approximately 1,200 subjects scanned at  
7 3T. We limited our analysis to subjects who had complete data for all six functional runs of interest  
8 as well as complete data for the phenotypic variables of interest (described further below in the  
9 sections *fMRI data* and *Behavioral data*, respectively), yielding a set of  $n = 176$ . Notably, there  
10 were many sets of twins (both mono- and dizygotic) and siblings in this dataset, such that these  
11 176 subjects came from only 90 unique families. Relatedness was taken into account during cross-  
12 validation using a leave-one-family-out approach, described further in the section on *Connectome-*  
13 *based Predictive Modeling*. All subjects were generally healthy young adults between 22-36 years  
14 old (mean age = 29.4, standard deviation = 3.3).

15

#### 16 *fMRI data.*

17 All fMRI data were acquired on a 7 Tesla Siemens Magnetom scanner at the Center for Magnetic  
18 Resonance Research at the University of Minnesota. There were four scan sessions total spread  
19 across two or three days; we focus here on the first and last session (which we refer to as session  
20 1 and session 2 here), since these contained the movie-watching runs of interest. REST and  
21 MOVIE runs were collected using the same gradient-echo echo-planar imaging (EPI) sequence  
22 with the following parameters: repetition time (TR) = 1000 ms, echo time (TE) = 22.2 ms, flip  
23 angle = 45 deg, field of view (FOV) = 208 x 208 mm, matrix = 130 x 130, spatial resolution = 1.6  
24 mm<sup>3</sup>, number of slices = 85, multiband factor = 5, image acceleration factor (iPAT) = 2, partial  
25 Fourier sampling = 7/8, echo spacing = 0.64 ms, bandwidth = 1924 Hz/Px. The direction of phase  
26 encoding alternated between posterior-to-anterior (PA; REST1, MOVIE2, MOVIE3) and anterior-  
27 to-posterior (AP; REST4, MOVIE1, MOVIE4).

28

29 Each REST run was 900 TRs, or 15:00 minutes, in length. MOVIE runs 1-4 were 921, 918, 915,  
30 and 901 TRs, respectively. However, when calculating functional connectivity during MOVIE  
31 runs, we discarded TRs corresponding to the 20-second rest blocks in between video clips



1 (described in more detail in *Stimuli* below). To avoid large changes in BOLD signal at the onset  
2 of individual clips that could skew correlations between node timecourses, we excluded the first  
3 10 TRs (10 seconds) of each clip when calculating functional connectivity. On the other hand, to  
4 account for hemodynamic delay, we included the 5 TRs (5 seconds) after video offset in the  
5 calculation. This lead to effective durations of 775, 800, 769, and 783 for the MOVIE runs. If  
6 anything, the reduced duration for movie runs compared to rest should disadvantage movies,  
7 working against our hypothesis.

8  
9 While four REST runs were collected, here we use only data from REST1 and REST4, as these  
10 were acquired in the same scan sessions as MOVIE1/MOVIE2 and MOVIE3/MOVIE4,  
11 respectively. Within a session, REST runs were always acquired first, followed by the movie runs  
12 in a fixed order, such that session 1 consisted of REST1, MOVIE1, and MOVIE3, and session 2  
13 consisted of REST4, MOVIE3, and MOVIE4.

14  
15 All analyses began with the FIX-denoised data in volume space (e.g.,  
16 *rfMRI\_REST1\_7T\_PA\_hp2000\_clean.nii.gz*; *tfMRI\_MOVIE1\_7T\_AP\_hp2000\_clean.nii.gz*),  
17 which includes standard preprocessing (motion correction, distortion correction, high-pass  
18 filtering, and nonlinear alignment to MNI template space (Glasser et al., 2013) plus regression of  
19 24 framewise motion estimates (six rigid-body motion parameters and their derivatives and the  
20 squares of those) and regression of confound timeseries identified via independent components  
21 analysis (Griffanti et al., 2014; Salimi-Khorshidi et al., 2014). In addition to this preprocessing,  
22 we calculated the average whole-brain signal at each TR using an HCP-provided per-subject, per-  
23 run mask (*brainmask\_fs.1.60.nii.gz*) and regressed this from the FIX-denoised images, in light of  
24 prior work (Li et al., 2019) and our own unpublished observations that global signal regression  
25 strengthens the association between functional connectivity and behavior.

26  
27 *Stimuli*

28 During REST runs, subjects were instructed to keep their eyes open and maintain relaxed fixation  
29 on a projected bright cross-hair on a dark background.

30

1 During MOVIE runs, subjects passively viewed a series of video clips with audiovisual content.  
2 Each MOVIE run consisted of 4 or 5 clips, separated by 20 s of rest (indicated by the word “REST”  
3 in white text on a black background). Two of the runs, MOVIE1 and MOVIE3, contained clips  
4 from independent films (both fiction and documentary) made freely available under Creative  
5 Commons license on Vimeo. The other two runs, MOVIE2 and MOVIE4, contained clips from  
6 Hollywood films. The last clip was always a montage of brief (1.5 s) videos that was identical  
7 across each of the four runs (to facilitate test-retest and/or validation analyses). For brief  
8 descriptions of each clip, see Table 1. Audio was delivered via Sensimetric earbuds.

9  
10 Clips varied in length from 1:03 to 4:19 min:sec. Because having more data typically boosts  
11 accuracy in both individual identification and behavioral prediction, for analyses where we wished  
12 to compare prediction performance across clips, we truncated data from each clip to the length of  
13 one of the shortest clips, which was 143 TRs (2:23 min:sec). The very shortest clip was only 1:03  
14 in duration, and the test-retest clips at the end of each run were 1:23 in duration. Because truncating  
15 all clips to 83 TRs would have severely limited the data available to the model, we omitted these  
16 shortest clips from the comparisons.

17  
18 *Behavioral data.* HCP provides a large number of phenotypic measures from a variety of domains.  
19 We focused on traits in two domains: 1) cognition, and 2) emotion/affect. To avoid incurring a  
20 multiple-comparisons issue by training models for each individual measure, and because many  
21 measures within a domain are correlated with one another, we first performed principal  
22 components analysis (PCA) to reduce the dimensionality of the data. Importantly, given that the  
23 subjects scanned at 7T are a subset of those scanned at 3T, we learned the principal components  
24 on the complement of the 7T subset—in other words, the subjects scanned at 3T but not at 7T ( $n$   
25 = 1,022)—and applied this PC-based transformation to data from the 7T subjects to derive PC  
26 scores for each 7T subject. Thus we were able to calculate these summary scores once at the start  
27 of our analysis pipeline without incurring circularity, or leakage of information from the test set  
28 into the training set. (Otherwise, we would have had to reperform the PCA step at each fold of  
29 each cross-validation procedure, resulting in slightly different transformations each time.)

30

1 PCA was performed separately for the cognition and emotion domains. Individual measures were  
2 normalized to have zero mean, unit variance in the training set, and this same normalization (using  
3 the mean and standard deviation from the training set) was applied to the test set prior to PCA  
4 transformation. Variables entered into the cognition PCA included measures from the NIH  
5 Cognition Toolbox as well as additional measures from other instruments classified in “cognition”  
6 by the HCP. Variables entered into the emotion PCA were scales from the NIH Emotion Toolbox,  
7 a self-report battery assessing A full list of measures entered into each PCA is provided in  
8 Supplementary Tables 1 and 2.

9

### 10 *Eye-tracking data.*

11 Eye tracking was acquired during both REST and MOVIE runs using an EyeLink S1000 system  
12 (SR Research). We extracted eye-tracking data from two files: 1) the HCP-provided session  
13 summary for each subject for each run (e.g., *100610\_7T\_MOVI\_eyetrack\_summary.csv*), which  
14 provides metadata and quality control measures, and 2) the raw EyeLink log files (e.g.,  
15 *100610\_7T\_MOVI\_eyetrack.asc*), which provide horizontal position, vertical gaze position, pupil  
16 size measures for each timepoint, as well as tags corresponding to blink onset and offset. Of the  
17 1,056 runs of interest (176 subjects x 6 runs each), valid eye-tracking data were available for 931  
18 runs. While most of these (n = 835) had a sampling rate of 1000 Hz, a few (n = 96) had a sampling  
19 rate of 500 Hz. All 931 sessions were used for analyses of blinks, but analyses of inter-subject  
20 correlation in gaze position were limited to runs with sampling rate of 1000 Hz.

21

22 For analyses of blinks, while all available data points are shown in the boxplots in Fig. 3, due to  
23 the paired nature of the comparisons, the input to statistical tests was limited to subjects that had  
24 valid data for both runs in each pair of interest. Between-clip rest blocks were not removed from  
25 MOVIE runs in analyzing blinks.

26

27 In calculating inter-subject correlations in gaze position for individual video clips (analyses shown  
28 in Fig. 8), we discarded the first 5 seconds after video onset, to avoid biases from large jumps in  
29 gaze position at the start of a video.

30

### 31 *Mitigating confounds*

1  
2 Head motion produces well-known artifacts in functional connectivity. To determine if and how  
3 head motion might confound our analyses, we assessed whether and to what extent 1) head motion  
4 differed across runs, and 2) head motion was correlated with target behavior scores, using mean  
5 framewise displacement across TRs as our measure of head motion  
6 (*Movement\_RelativeRMS\_mean.txt*).

7  
8 In session 1, MOVIE1 had higher motion than REST1 (paired t-test:  $t_{175} = 5.3$ ,  $p < 10^{-6}$ ; note that  
9 this is the opposite of what might be the expected direction), but there was no difference between  
10 REST1 and MOVIE2 ( $t_{175} = 1.0$ ,  $p = 0.32$ ). In session 2, REST4 had higher motion than both  
11 MOVIE3 ( $t_{175} = 8.9$ ,  $p < 10e^{-15}$ ) and MOVIE4 ( $t_{175} = 3.3$ ,  $p = 0.001$ ) (Fig. S1a).

12  
13 Similar to previous reports in this (Siegel et al., 2016) and other datasets, head motion was  
14 negatively correlated with cognition score. This was true in all six runs (see Fig. S1b for correlation  
15 coefficients and p-values). However, critically, the magnitude of this correlation did not differ  
16 across any pair of runs (all  $p > 0.11$ , Steiger's Z test). This makes it unlikely that differences in  
17 prediction accuracy across runs are influenced by the relationship between head motion and  
18 cognition score. Head motion was not correlated with emotion score in any of the six runs (all  $p >$   
19  $0.16$ ; Fig. S1c).

20  
21 Given reports that time of day can affect measurements of functional connectivity, we also  
22 assessed differences across runs in the time of day they were acquired. Acquisition time for session  
23 1 followed a bimodal distribution, with some subjects being scanned in mid- to late morning, while  
24 others were scanned fairly late in the evening (centered roughly around 20:00, or 8:00pm). Session  
25 2 followed a unimodal distribution centered around noon, but still with considerable variability  
26 across subjects (Fig. S2a). To determine whether time-of-day effects might pose a confound for  
27 our behavioral prediction analyses, we correlated time of day with behavior score across subjects.  
28 For runs in session 1, time of day was negatively correlated with cognition score, such that subjects  
29 who were scanned later in the day tended to have lower scores (Fig. S2b). These correlations were  
30 particularly surprising given that to the best of our knowledge, behavioral data acquisition took  
31 place at Washington University in St. Louis before participants were flown to Minneapolis for the

1 7T portion of the study at University of Minnesota. Therefore the behavioral and fMRI data  
2 acquisitions were likely separated by a period of at least days to weeks (if not longer), and it is  
3 hard to imagine an *a priori* reason that subjects with higher cognitive ability would be scanned  
4 earlier in the day, especially because they traveled to Minneapolis for the express purpose of  
5 completing this study and thus presumably were not constrained by their typical schedules.  
6 However, cognition score was not correlated with time of day for runs in session 2, and emotion  
7 score was not correlated with acquisition time for any of the six runs (Fig. S2c). Furthermore, just  
8 as for head motion, the magnitude of the correlation between time of day and cognition score did  
9 not differ across any pair of runs (all  $p > 0.08$ , Steiger's Z test), making it unlikely that differences  
10 in prediction accuracy are influenced by time of day.

11  
12 To mitigate the effect of these potential confounds, we residualized the target variable (cognition  
13 or emotion score) with respect to these two variables (head motion and time of day) before training  
14 the model. At each fold in the 10-fold cross-validation procedure, using subjects from the 9 training  
15 folds, we modeled the target variable ( $y_{train}$ ) as a linear combination of the two confounding  
16 variables and took the residual of this model  $e_{train}$  ( $y_{train} - \hat{y}_{train}$ ) as input to the feature selection and  
17 model building steps. This same linear model was applied to data from subjects in the test fold to  
18 obtain a “ground truth” behavior score  $e_{test}$  ( $y_{test} - \hat{y}_{test}$ ). To assess accuracy, model predictions were  
19 compared to  $e_{test}$  (rather than raw score  $y_{test}$ ) as described further in the Connectome-based  
20 Predictive Modeling section below.

21  
22 Functional connectivity

23  
24 For each subject and each run, we took the framewise average (at each TR) of the voxelwise signals  
25 in each of 268 nodes from the Shen atlas (Shen et al., 2013), a functional parcellation defined  
26 previously on a separate group of healthy adults. This parcellation covers the whole brain,  
27 including cortex, subcortex, and cerebellum. We then correlated all possible pairs of node  
28 timecourses to construct 268 x 268 symmetric connectivity matrices (one per subject per run). For  
29 purposes of model building, we extracted and vectorized the upper triangle of these matrices  
30 (35,778 total connections, or edges) to use as input features.

31

## 1 Connectome-based Predictive Modeling

2

### 3 *Overview*

4 Connectome-based predictive modeling (CPM) is a data-driven approach that uses whole-brain  
5 functional connectivity to predict behavior (Finn et al., 2015; Shen et al., 2017). In brief, the steps  
6 involved in CPM are as follows:

7

- 8 1. Given a full set of subjects, each with a connectivity matrix and behavioral score, divide  
9 the data into training and test sets (here, we used 100 iterations of 10-fold cross-validation,  
10 where models were trained on 9 folds and tested on the held-out 10<sup>th</sup> fold).
- 11 2. In the training set, perform mass univariate correlation between the strength of each edge  
12 (functional connectivity  $r$  value) and the target behavior.
- 13 3. Apply a feature selection threshold based on the magnitude and/or p-value associated with  
14 the correlation coefficients calculated in (2). This threshold is a hyperparameter that may  
15 be tuned if desired; here, we chose  $|r| = 0.2$  (corresponding to a two-tailed p-value of  
16 approximately 0.01), since this provides good accuracy with relatively sparse features.  
17 Previous work has shown that results are generally robust to choice of threshold (Finn et  
18 al., 2015; Jangraw et al., 2018).
- 19 4. Divide edges from (3) into two tails (positive and negative) based on the sign of their  
20 correlation with behavior, then for each subject, calculate the summed strength across all  
21 edges in a given tail ( $X_{\text{pos}}$  and  $X_{\text{neg}}$ ).
- 22 5. Build a linear model relating the positive and negative network strengths calculated in (4)  
23 to behavior score ( $y$ ):

24

$$25 \quad y = \beta_0 + \beta_1(X_{\text{pos}}) + \beta_2(X_{\text{neg}}) + \varepsilon$$

26

- 27 6. Calculate positive and negative network strength ( $X_{\text{pos}}$  and  $X_{\text{neg}}$ ) for each subject in the test  
28 set by applying the masks defined in (3) to their functional connectivity data, and use these  
29 as input to the linear model in (5) to generate predicted behavior scores.

30



1 For further details and comparisons with other predictive modeling approaches, see Shen et al.  
2 (2017).

3

#### 4 *Cross validation*

5 Cross-validation was performed as follows. We first divided subjects into 10 folds respecting  
6 family structure, such that sets of siblings were always together in either the train set or the test set  
7 (never split with one sibling in the train set and another in the test set). We then trained a CPM  
8 using 9 of the 10 folds, and applied the resulting model to data from the held-out fold to generate  
9 predicted behavioral scores for all subjects in that fold. Iterating through all 10 folds yielded a  
10 vector of predicted behavioral scores for all 176 subjects in the dataset. We then repeated this  
11 entire process 100 times, to assess sensitivity of model accuracy to different fold splits.

12

#### 13 *Assessing model accuracy*

14 We assessed prediction accuracy by calculating the Spearman (rank) coefficient between predicted  
15 (model generated) and observed (true) scores across subjects. Correlation is a relative measure of  
16 accuracy rather than an absolute one (e.g., mean squared error). Given that the target variables  
17 were principal component scores that were themselves made up mostly of variables measured on  
18 an arbitrary scale, we believe that relative performance—i.e., the model’s ability to distinguish  
19 higher versus lower scoring subjects—is the most appropriate metric. Because successful relative  
20 or rank prediction across subjects was our explicit goal, we used Spearman rather than Pearson  
21 correlation. However, results should be interpreted in the context of this choice, because models  
22 with good relative accuracy may still suffer from high absolute error.

23

#### 24 *Statistical testing*

25 To assess the statistical significance of prediction accuracies, we generated a null distribution of  
26 expected accuracies due to chance by shuffling behavioral scores with respect to connectivity  
27 matrices and reperforming the entire analysis pipeline. A total of 10,000 randomizations were  
28 performed for each input-output combo (e.g., REST1-cognition score, MOVIE1-cognition score,  
29 inception-emotion score). We then calculated a non-parametric p-value for the observed model  
30 accuracy using the following formula,

31

1 
$$p = \frac{\text{sum}(r_{null} > \text{median}(r_{obs})) + 1}{n_{null} + 1}$$

2

3 where  $n_{null} = 10,000$  and  $\text{median}(r_{obs})$  is the median accuracy of the 100 true models.

4

#### 5 Anatomy of predictive networks

6

7 Due to the nature of cross-validated model building, different sets of edges may be selected at each  
8 fold of a single 10-fold cross-validation, as well as across the 100 iterations of 10-fold cross-  
9 validation. In selecting edges to visualize and interpret, for a given run, behavior score, and tail  
10 (positive and negative), we first averaged the number of times an edge was selected *within* each  
11 10-fold run (resulting in a number between 0 and 1 for each edge), and then averaged those  
12 fractions across all 100 train-test split iterations. We then limited visualization to edges that  
13 appeared in at least 90 percent of all models, to ensure that we were considering only edges that  
14 were most robustly associated with and predictive of behavior.

15

16 We assessed significance of edge overlap across runs and videos using the hypergeometric  
17 cumulative distribution function, which gives the probability of observing a given overlap in “hits”  
18 between two binary vectors based on the total number of “hits” in each vector and the total possible  
19 hits.

20

21 For visualization purposes, we summarized edges in two ways: 1) based on individual nodes, and  
22 2) by pooling edges into larger anatomical regions using a predefined assignment of nodes into  
23 lobes and other macroscale territories. In both cases, markers were sized by the total number of  
24 edges across both positive and negative networks (such that larger areas had more connections  
25 overall; note that individual nodes may have connections in both networks), and colored by the  
26 difference between totals in the positive and negative networks (such that red indicates more  
27 representation in the positive network, blue in the negative network, and yellow in between).

28

#### 29 Video clip feature extraction

30

1 We extracted video clip features in two ways: 1) by using semantic-category labels that describe  
2 high-level features of the movies made available by the HCP  
3 (*7T\_movie\_resources/WordNetFeatures.hdf5*) based on the approach in (Huth et al., 2012), and 2)  
4 by using the open-source package *pliers* (McNamara et al., 2017)  
5 (<https://github.com/tyarkoni/pliers>) to extract a number of additional features for each of the  
6 movies, including the low-level properties of brightness (luminance), vibrance, optical flow, and  
7 the mid-level property of presence of faces onscreen. Labels from (1) are provided at the same  
8 temporal resolution of the fMRI data (i.e., one set of labels per TR); we averaged these across TRs  
9 to arrive at one set of labels per video representing the average semantic content onscreen during  
10 that video. For labels in (2), we extracted features at the temporal resolution of the videos  
11 themselves (i.e., one value per frame, where the frame rate of the videos was 24 frames per second),  
12 then averaged these. In both cases, we restricted this averaging to the first 143 TRs of the videos,  
13 to match the fMRI data that were used as input to CPM.

## REFERENCES

- Bentivoglio, A.R., Bressman, S.B., Cassetta, E., Carretta, D., Tonali, P., and Albanese, A. (1997). Analysis of blink rate patterns in normal subjects. *Mov Disord* 12, 1028-1034.
- Betti, V., Della Penna, S., de Pasquale, F., Mantini, D., Marzetti, L., Romani, Gian L., and Corbetta, M. (2013). Natural Scenes Viewing Alters the Dynamics of Functional Connectivity in the Human Brain. *Neuron* 79, 782-797.
- Betzel, R.F., Byrge, L., Esfahlani, F.Z., and Kennedy, D.P. (2020). Temporal fluctuations in the brain's modular architecture during movie-watching. *Neuroimage* 213, 116687.
- Bijsterbosch, J.D., Woolrich, M.W., Glasser, M.F., Robinson, E.C., Beckmann, C.F., Van Essen, D.C., Harrison, S.J., and Smith, S.M. (2018). The relationship between spatial configuration and functional connectivity of brain regions. *eLife* 7, e32992.
- Bolton, T.A.W., Jochaut, D., Giraud, A.L., and Ville, D.V.D. (2018). Brain dynamics in ASD during movie-watching show idiosyncratic functional integration and segregation. *Hum Brain Mapp* 39, 2391-2404.
- Byrge, L., Dubois, J., Tyszka, J.M., Adolphs, R., and Kennedy, D.P. (2015). Idiosyncratic Brain Activation Patterns Are Associated with Poor Social Comprehension in Autism. *J Neurosci* 35, 5837-5850.
- Chen, P.-H.A., Jolly, E., Cheong, J.H., and Chang, L.J. (2019). Inter-subject representational similarity analysis reveals individual variations in affective experience when watching erotic movies. *bioRxiv*, 726570.
- Cole, M.W., Yarkoni, T., Repovš, G., Anticevic, A., and Braver, T.S. (2012). Global connectivity of prefrontal cortex predicts cognitive control and intelligence. *J Neurosci* 32, 8988-8999.
- Cutting, J.E., Brunick, K.L., DeLong, J.E., Iricinschi, C., and Candan, A. (2011). Quicker, faster, darker: Changes in Hollywood film over 75 years. *i-Perception* 2, 569-576.
- Demirtaş, M., Ponce-Alvarez, A., Gilson, M., Hagmann, P., Mantini, D., Betti, V., Romani, G.L., Friston, K., Corbetta, M., and Deco, G. (2019). Distinct modes of functional connectivity induced by movie-watching. *Neuroimage* 184, 335-348.
- Dubois, J., and Adolphs, R. (2016). Building a Science of Individual Differences from fMRI. *Trends in Cognitive Sciences* 20, 425-443.
- Dunbar, R.I. (1998). The social brain hypothesis. *Evolutionary Anthropology: Issues, News, and Reviews: Issues, News, and Reviews* 6, 178-190.
- Eickhoff, S.B., Milham, M., and Vanderwal, T. (2020). Towards clinical applications of movie fMRI. *Neuroimage*, 116860.

Evinger, C., Manning, K.A., and Sibony, P.A. (1991). Eyelid movements. Mechanisms and normal data. *Invest Ophthalmol Vis Sci* 32, 387-400.

Ferguson, M.A., Anderson, J.S., and Spreng, R.N. (2017). Fluid and flexible minds: Intelligence reflects synchrony in the brain's intrinsic network architecture. *Network Neuroscience*.

Finn, E.S., and Constable, R.T. (2016). Individual variation in functional brain connectivity: implications for personalized approaches to psychiatric disease. *Dialogues Clin Neurosci* 18, 277-287.

Finn, E.S., Corlett, P.R., Chen, G., Bandettini, P.A., and Constable, R.T. (2018). Trait paranoia shapes inter-subject synchrony in brain activity during an ambiguous social narrative. *Nature Communications* 9, 2043.

Finn, E.S., Glerean, E., Khojandi, A.Y., Nielson, D., Molfese, P.J., Handwerker, D.A., and Bandettini, P.A. (2020). Idiosynchrony: From shared responses to individual differences during naturalistic neuroimaging. *Neuroimage* 215, 116828.

Finn, E.S., Scheinost, D., Finn, D.M., Shen, X., Papademetris, X., and Constable, R.T. (2017). Can brain state be manipulated to emphasize individual differences in functional connectivity? *Neuroimage* 160, 140-151.

Finn, E.S., Shen, X., Scheinost, D., Rosenberg, M.D., Huang, J., Chun, M.M., Papademetris, X., and Constable, R.T. (2015). Functional connectome fingerprinting: identifying individuals using patterns of brain connectivity. *Nat Neurosci* 18, 1664-1671.

Gabrieli, John D.E., Ghosh, Satrajit S., and Whitfield-Gabrieli, S. (2015). Prediction as a Humanitarian and Pragmatic Contribution from Human Cognitive Neuroscience. *Neuron* 85, 11-26.

Geerligs, L., Rubinov, M., Cam-CAN, and Henson, R.N. (2015). State and Trait Components of Functional Connectivity: Individual Differences Vary with Mental State. *J Neurosci* 35, 13949-13961.

Gilson, M., Deco, G., Friston, K.J., Hagmann, P., Mantini, D., Betti, V., Romani, G.L., and Corbetta, M. (2018). Effective connectivity inferred from fMRI transition dynamics during movie viewing points to a balanced reconfiguration of cortical interactions. *Neuroimage* 180, 534-546.

Glasser, M.F., Sotiropoulos, S.N., Wilson, J.A., Coalson, T.S., Fischl, B., Andersson, J.L., Xu, J., Jbabdi, S., Webster, M., Polimeni, J.R., *et al.* (2013). The minimal preprocessing pipelines for the Human Connectome Project. *Neuroimage* 80, 105-124.

Gratton, C., Laumann, T.O., Nielsen, A.N., Greene, D.J., Gordon, E.M., Gilmore, A.W., Nelson, S.M., Coalson, R.S., Snyder, A.Z., Schlaggar, B.L., *et al.* (2018). Functional Brain Networks Are Dominated by Stable Group and Individual Factors, Not Cognitive or Daily Variation. *Neuron* 98, 439-452.e435.

Greene, A.S., Gao, S., Noble, S., Scheinost, D., and Constable, R.T. (2020). How tasks change whole-brain functional organization to reveal brain-phenotype relationships. *bioRxiv*, 870287.

Greene, A.S., Gao, S., Scheinost, D., and Constable, R.T. (2018). Task-induced brain state manipulation improves prediction of individual traits. *Nature Communications* 9, 2807.

Griffanti, L., Salimi-Khorshidi, G., Beckmann, C.F., Auerbach, E.J., Douaud, G., Sexton, C.E., Zsoldos, E., Ebmeier, K.P., Filippini, N., and Mackay, C.E. (2014). ICA-based artefact removal and accelerated fMRI acquisition for improved resting state network imaging. *Neuroimage* 95, 232-247.

Gruskin, D.C., Rosenberg, M.D., and Holmes, A.J. (2019). Relationships between depressive symptoms and brain responses during emotional movie viewing emerge in adolescence. *bioRxiv*, 542720.

Hampson, M., Driesen, N.R., Skudlarski, P., Gore, J.C., and Constable, R.T. (2006). Brain connectivity related to working memory performance. *J Neurosci* 26, 13338-13343.

Hasson, U., Avidan, G., Gelbard, H., Vallines, I., Harel, M., Minshew, N., and Behrmann, M. (2009). Shared and idiosyncratic cortical activation patterns in autism revealed under continuous real-life viewing conditions. *Autism Research* 2, 220-231.

Hasson, U., Nir, Y., Levy, I., Fuhrmann, G., and Malach, R. (2004). Intersubject Synchronization of Cortical Activity During Natural Vision. *Science* 303, 1634-1640.

Hearne, L.J., Mattingley, J.B., and Cocchi, L. (2016). Functional brain networks related to individual differences in human intelligence at rest. *Sci Rep* 6.

Hsu, W.-T., Rosenberg, M.D., Scheinost, D., Constable, R.T., and Chun, M.M. (2018). Resting-state functional connectivity predicts neuroticism and extraversion in novel individuals. *Soc Cogn Affect Neurosci* 13, 224-232.

Huijbers, W., Van Dijk, K.R.A., Boenniger, M.M., Stirnberg, R., and Breteler, M.M.B. (2017). Less head motion during MRI under task than resting-state conditions. *Neuroimage* 147, 111-120.

Huth, Alexander G., Nishimoto, S., Vu, An T., and Gallant, Jack L. (2012). A Continuous Semantic Space Describes the Representation of Thousands of Object and Action Categories across the Human Brain. *Neuron* 76, 1210-1224.

Jangraw, D.C., Gonzalez-Castillo, J., Handwerker, D.A., Ghane, M., Rosenberg, M.D., Panwar, P., and Bandettini, P.A. (2018). A functional connectivity-based neuromarker of sustained attention generalizes to predict recall in a reading task. *Neuroimage* 166, 99-109.

KARSON, C.N. (1983). SPONTANEOUS EYE-BLINK RATES AND DOPAMINERGIC SYSTEMS. *Brain* 106, 643-653.



Kong, R., Li, J., Orban, C., Sabuncu, M.R., Liu, H., Schaefer, A., Sun, N., Zuo, X.-N., Holmes, A.J., and Eickhoff, S.B. (2019). Spatial topography of individual-specific cortical networks predicts human cognition, personality, and emotion. *Cereb Cortex* 29, 2533-2551.

Laumann, T.O., Gordon, E.M., Adeyemo, B., Snyder, A.Z., Joo, S.J., Chen, M.-Y., Gilmore, A.W., McDermott, K.B., Nelson, S.M., and Dosenbach, N.U. (2015). Functional System and Areal Organization of a Highly Sampled Individual Human Brain. *Neuron*.

Li, J., Kong, R., Liégeois, R., Orban, C., Tan, Y., Sun, N., Holmes, A.J., Sabuncu, M.R., Ge, T., and Yeo, B.T.T. (2019). Global signal regression strengthens association between resting-state functional connectivity and behavior. *Neuroimage* 196, 126-141.

McNamara, Q., De La Vega, A., and Yarkoni, T. (2017). Developing a comprehensive framework for multimodal feature extraction. Paper presented at: Proceedings of the 23rd ACM SIGKDD International Conference on Knowledge Discovery and Data Mining.

Montague, P.R., Dolan, R.J., Friston, K.J., and Dayan, P. (2012). Computational psychiatry. *Trends in cognitive sciences* 16, 72-80.

Nastase, S.A., Gazzola, V., Hasson, U., and Keysers, C. (2019). Measuring shared responses across subjects using intersubject correlation. *Soc Cogn Affect Neurosci* 14, 667-685.

Nguyen, M., Vanderwal, T., and Hasson, U. (2019). Shared understanding of narratives is correlated with shared neural responses. *Neuroimage* 184, 161-170.

Noble, S., Spann, M.N., Tokoglu, F., Shen, X., Constable, R.T., and Scheinost, D. (2017). Influences on the Test–Retest Reliability of Functional Connectivity MRI and its Relationship with Behavioral Utility. *Cereb Cortex* 27, 5415-5429.

Patzelt, E.H., Hartley, C.A., and Gershman, S.J. (2018). Computational phenotyping: using models to understand individual differences in personality, development, and mental illness. *Personality Neuroscience* 1.

Rosenberg, M.D., Finn, E.S., Scheinost, D., Papademetris, X., Shen, X., Constable, R.T., and Chun, M.M. (2016). A neuromarker of sustained attention from whole-brain functional connectivity. *Nat Neurosci* 19, 165-171.

Rosenberg, M.D., Scheinost, D., Greene, A.S., Avery, E.W., Kwon, Y.H., Finn, E.S., Ramani, R., Qiu, M., Constable, R.T., and Chun, M.M. (2020). Functional connectivity predicts changes in attention observed across minutes, days, and months. *Proc Natl Acad Sci USA* 117, 3797-3807.

Salehi, M., Greene, A.S., Karbasi, A., Shen, X., Scheinost, D., and Constable, R.T. (2020). There is no single functional atlas even for a single individual: Functional parcel definitions change with task. *Neuroimage* 208, 116366.

Salimi-Khorshidi, G., Douaud, G., Beckmann, C.F., Glasser, M.F., Griffanti, L., and Smith, S.M. (2014). Automatic denoising of functional MRI data: Combining independent component analysis and hierarchical fusion of classifiers. *Neuroimage* 90, 449-468.

Salmi, J., Metwaly, M., Tohka, J., Alho, K., Leppämäki, S., Tani, P., Koski, A., Vanderwal, T., and Laine, M. (2020). ADHD desynchronizes brain activity during watching a distracted multi-talker conversation. *Neuroimage* *216*, 116352.

Salmi, J., Roine, U., Glerean, E., Lahnakoski, J., Nieminen-von Wendt, T., Tani, P., Leppämäki, S., Nummenmaa, L., Jääskeläinen, I.P., Carlson, S., *et al.* (2013). The brains of high functioning autistic individuals do not synchronize with those of others. *NeuroImage: Clinical* *3*, 489-497.

Shen, X., Finn, E.S., Scheinost, D., Rosenberg, M.D., Chun, M.M., Papademetris, X., and Constable, R.T. (2017). Using connectome-based predictive modeling to predict individual behavior from brain connectivity. *Nat Protocols* *12*, 506-518.

Shen, X., Tokoglu, F., Papademetris, X., and Constable, R. (2013). Groupwise whole-brain parcellation from resting-state fMRI data for network node identification. *Neuroimage* *82*, 403-415.

Siegel, J.S., Mitra, A., Laumann, T.O., Seitzman, B.A., Raichle, M., Corbetta, M., and Snyder, A.Z. (2016). Data quality influences observed links between functional connectivity and behavior. *Cereb Cortex* *27*, 4492-4502.

Smith, S.M., Vidaurre, D., Beckmann, C.F., Glasser, M.F., Jenkinson, M., Miller, K.L., Nichols, T.E., Robinson, E.C., Salimi-Khorshidi, G., and Woolrich, M.W. (2013). Functional connectomics from resting-state fMRI. *Trends in cognitive sciences* *17*, 666-682.

Sonkusare, S., Breakspear, M., and Guo, C. (2019). Naturalistic Stimuli in Neuroscience: Critically Acclaimed. *Trends in Cognitive Sciences* *23*, 699-714.

van Baar, J.M., Chang, L.J., and Sanfey, A.G. (2019). The computational and neural substrates of moral strategies in social decision-making. *Nature Communications* *10*, 1483.

van den Heuvel, M.P., Stam, C.J., Kahn, R.S., and Pol, H.E.H. (2009). Efficiency of functional brain networks and intellectual performance. *J Neurosci* *29*, 7619-7624.

Van Essen, D.C., Smith, S.M., Barch, D.M., Behrens, T.E., Yacoub, E., and Ugurbil, K. (2013). The WU-Minn human connectome project: an overview. *Neuroimage* *80*, 62-79.

Vanderwal, T., Eilbott, J., Finn, E.S., Craddock, R.C., Turnbull, A., and Castellanos, F.X. (2017). Individual differences in functional connectivity during naturalistic viewing conditions. *Neuroimage* *157*, 521-530.

Vanderwal, T., Kelly, C., Eilbott, J., Mayes, L.C., and Castellanos, F.X. (2015). Inscapes: A movie paradigm to improve compliance in functional magnetic resonance imaging. *Neuroimage* *122*, 222-232.

Waites, A.B., Stanislavsky, A., Abbott, D.F., and Jackson, G.D. (2005). Effect of prior cognitive state on resting state networks measured with functional connectivity. *Hum Brain Mapp* *24*, 59-68.

Wang, J., Ren, Y., Hu, X., Nguyen, V.T., Guo, L., Han, J., and Guo, C.C. (2017). Test–retest reliability of functional connectivity networks during naturalistic fMRI paradigms. *Hum Brain Mapp* 38, 2226-2241.

Woo, C.-W., Chang, L.J., Lindquist, M.A., and Wager, T.D. (2017). Building better biomarkers: brain models in translational neuroimaging. *Nat Neurosci* 20, 365.

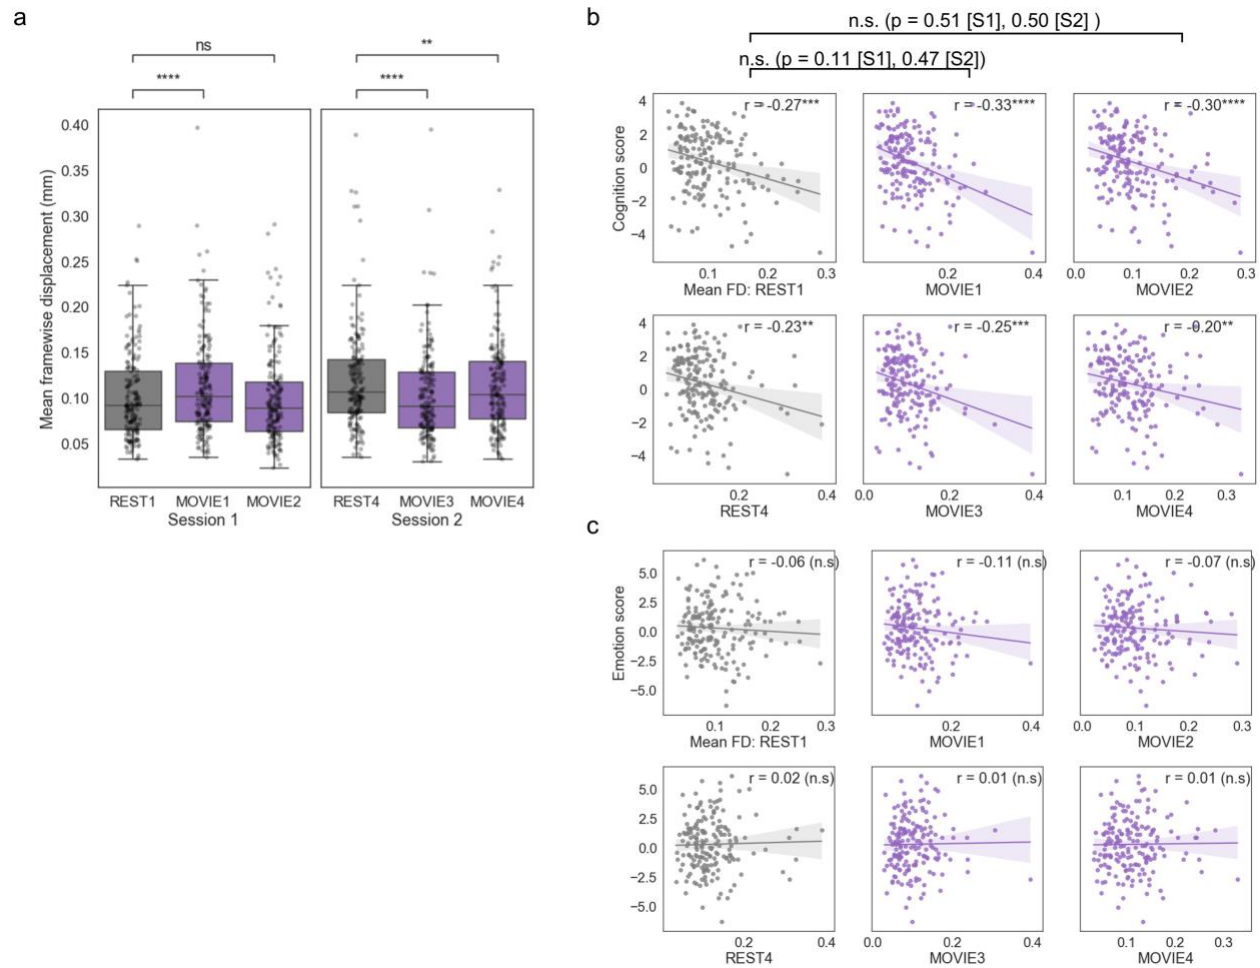

**Supplemental Figure 1. Differences in head motion across runs and correlations between head motion and behavior.** a) Distributions of head motion (as indexed by mean framewise displacement [FD]) across runs. Each subject contributes one data point. b) Correlations between head motion in each run ( $x$  axis) and cognition score ( $y$  axis) across subjects. While head motion was significantly negatively associated with cognition score for all six runs, the magnitude of this correlation did not differ between runs. c) Correlations between head motion in each run ( $x$  axis) and emotion score ( $y$  axis) across subjects. Head motion was not associated with emotion score in any run. n.s., not significant ( $p > 0.05$ ); \* $p < 0.05$ ; \*\* $p < 0.01$ ; \*\*\* $p < 0.001$ ; \*\*\*\* $p < 0.0001$ .

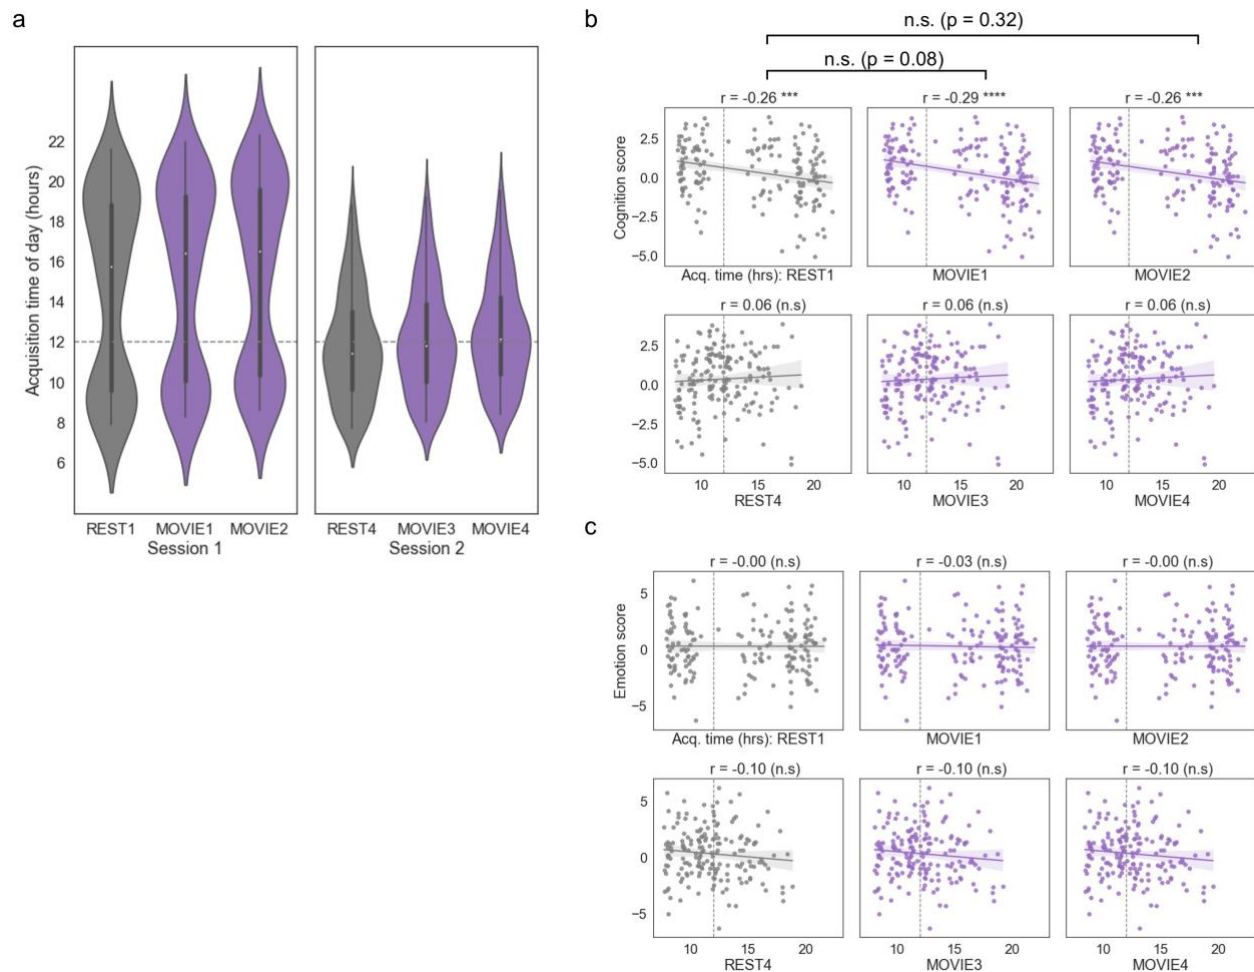

**Supplemental Figure 2. Differences in acquisition time of day across runs and correlations between time of day and behavior.** a) Distributions of acquisition time of day across runs. Each subject contributes one data point. b) Correlations between acquisition time of day for each run (x axis) and cognition score (y axis) across subjects. While time of day was significantly negatively associated with cognition score across runs in session 1, the magnitude of this correlation did not differ between runs. c) Correlations between time of day of each run (x axis) and emotion score (y axis) across subjects. Time of day was not associated with emotion score in any run. In all graphs, dotted gray line represents noon (12pm). n.s., not significant ( $p > 0.05$ ); \* $p < 0.05$ ; \*\* $p < 0.01$ ; \*\*\* $p < 0.001$ ; \*\*\*\* $p < 0.0001$ .

## a Cognition

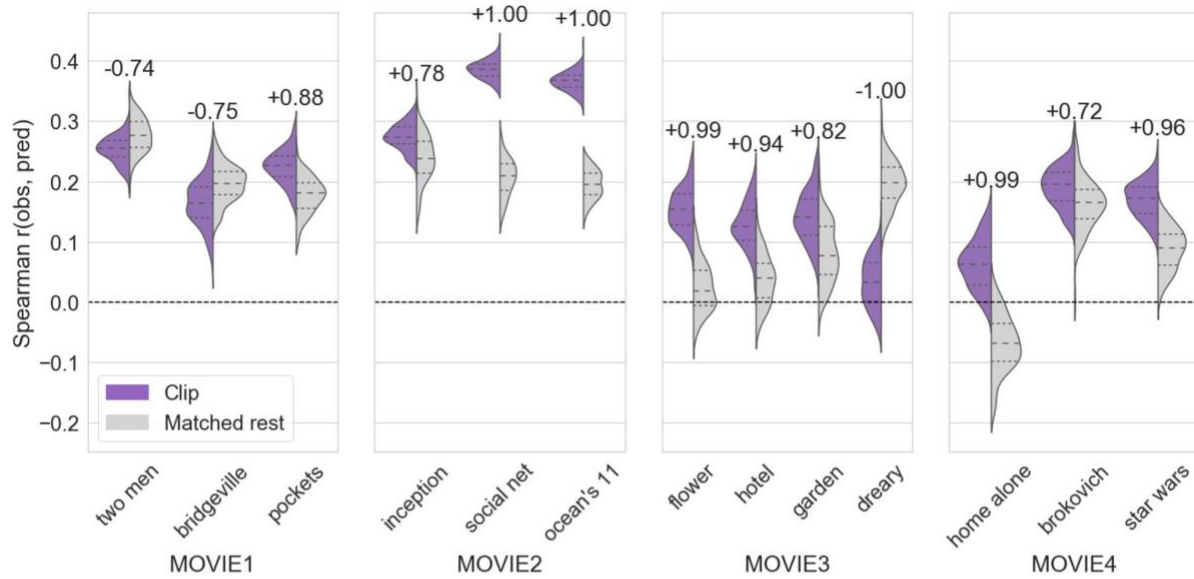

## b Emotion

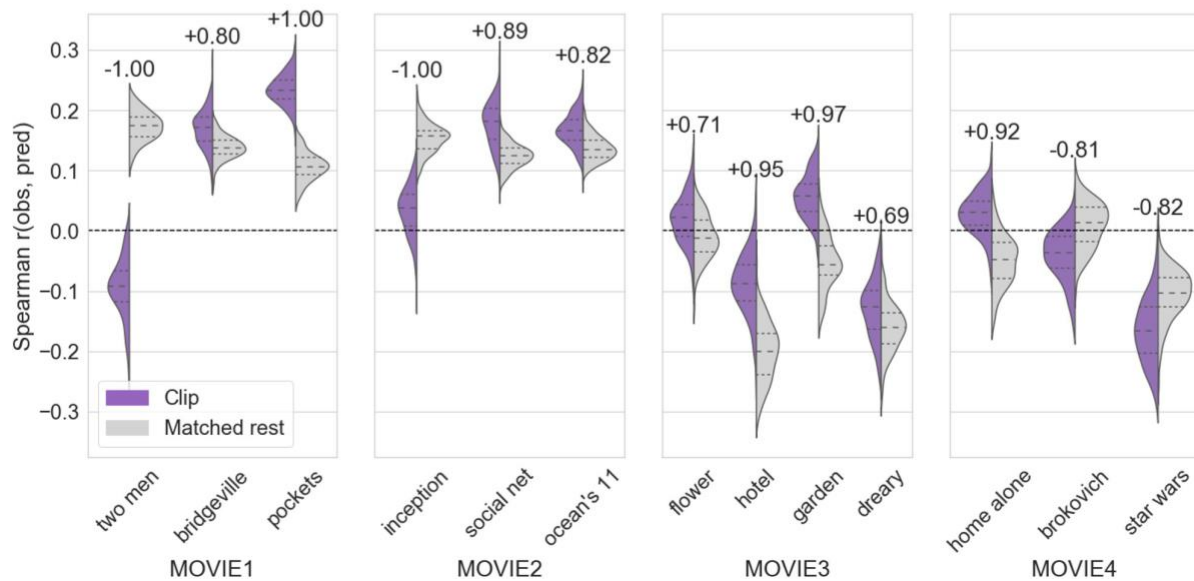

### Supplemental Figure 3. Comparing prediction accuracy between clips and their matched rest blocks.

For each clip, we compared the distribution of prediction accuracies based on functional connectivity matrices derived from the clip itself to functional connectivity matrices derived from a matching set of TRs in the rest run from the corresponding session. Each state (clip or matched rest; i.e., each side of a violin) has  $n = 100$  data points (from 100 iterations of 10-fold cross-validation). Dashed lines represent median and first and third quartiles. Clip distributions (purple) are the same as those shown in Fig. 5. Differences between states were assessed using Mann-Whitney U tests. All p-values were significant at  $p < 0.0001$ . The number written above each violin reflects the common-language effect size for the difference in accuracy between states (calculated as  $U/(n_1*n_2)$ ), or the proportion of sample pairs [1,000 total] that support a single direction). A plus sign (+) indicates that the effect is in the direction *clip* > *matched rest*, while a minus sign (-) indicates the opposite direction, *matched rest* > *clip*.

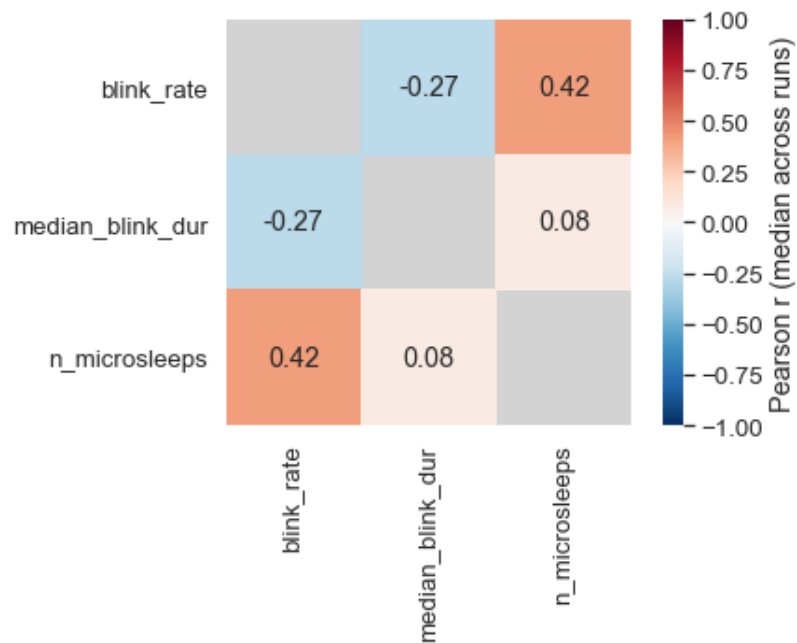

**Supplemental Figure 4. Correlations between blink-related eye tracking measures.** Blink rate and duration were moderately negatively correlated, such that subjects who blinked more tended to have faster blinks. Blink rate and number of microsleeps were positively correlated, such that subjects who blinked more also tended to have more microsleeps (defined as blinks equal to or greater than 1 s in duration). Blink duration and number of microsleeps were not strongly related. Pearson r values are the median across the six runs of interest (REST1, MOVIE1, MOVIE2, REST4, MOVIE3, MOVIE4).



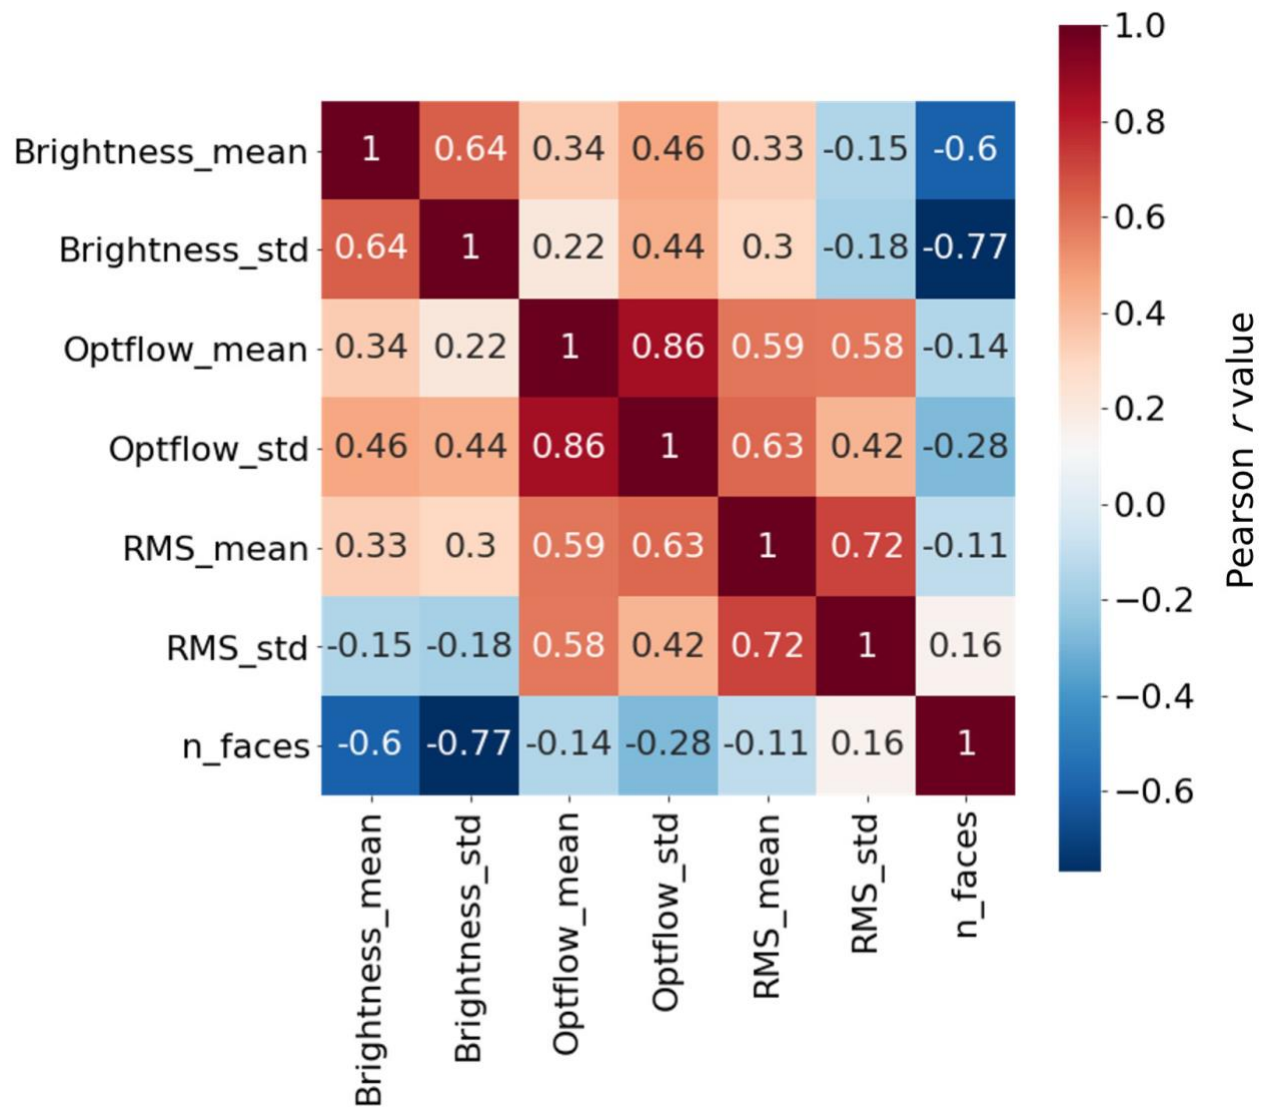

**Supplemental Figure 5. Collinearities between stimulus features.** Matrix of Pearson correlation coefficients between low-level and social features extracted from individual video clips ( $n = 13$ , same clips as in Fig. 5). Optflow, optical flow; RMS, audio root-mean-square (volume); n\_faces, number of TRs with at least one face onscreen. See also Fig. 7b,c.

| Measure                                             | Short name      | Construct                                |
|-----------------------------------------------------|-----------------|------------------------------------------|
| *Picture Sequence Memory                            | PicSeq_Unadj    | Episodic memory                          |
| *Dimensional Change Card Sort Test                  | CardSort_Unadj  | Executive function/cognitive flexibility |
| *Flanker Inhibitory Control and Attention Test      | Flanker_Unadj   | Executive function/inhibition            |
| Penn Progressive Matrices                           | PMAT24_A_CR     | Fluid intelligence                       |
| *Oral Reading Recognition Test                      | ReadEng_Unadj   | Language/reading decoding                |
| *Picture Vocabulary Test                            | PicVocab_Unadj  | Language/vocabulary comprehension        |
| *Pattern Comparison Processing Speed Test           | ProcSpeed_Unadj | Processing speed                         |
| Variable Short Penn Line Orientation                | VSPLIT_TC       | Spatial orientation                      |
| Short Penn Continuous Performance Test: Sensitivity | SCPT_SEN        | Sustained attention                      |
| Short Penn Continuous Performance Test: Specificity | SCPT_SPEC       | Sustained attention                      |
| Penn Word Memory Test                               | IWRD_TOT        | Verbal episodic memory                   |
| *List Sorting Working Memory Test                   | ListSort_Unadj  | Working memory                           |

**Table S1. Measures from HCP Cognition domain entered into principal components analysis to derive cognition score. \*indicates item from NIH Cognition Toolbox**

| Measure                          | Short name       | Domain                   |
|----------------------------------|------------------|--------------------------|
| Anger-Affect Survey              | AngAffect_Unadj  | Negative affect          |
| Anger-Hostility Survey           | AngHostil_Unadj  | Negative affect          |
| Anger-Physical Aggression Survey | AngAggr_Unadj    | Negative affect          |
| Fear-Affect Survey               | FearAffect_Unadj | Negative affect          |
| Fear-Somatic Arousal Survey      | FearSomat_Unadj  | Negative affect          |
| Sadness Survey                   | Sadness_Unadj    | Negative affect          |
| General Life Satisfaction Survey | LifeSatisf_Unadj | Psychological well-being |
| Meaning and Purpose Survey       | MeanPurp_Unadj   | Psychological well-being |
| Positive Affect Survey           | PosAffect_Unadj  | Psychological well-being |
| Friendship Survey                | Friendship_Unadj | Social relationships     |
| Loneliness Survey                | Loneliness_Unadj | Social relationships     |
| Perceived Hostility Survey       | PercHostil_Unadj | Social relationships     |
| Perceived Rejection Survey       | PercReject_Unadj | Social relationships     |
| Emotional Support Survey         | EmotSupp_Unadj   | Social relationships     |
| Instrumental Support Survey      | InstruSupp_Unadj | Social relationships     |
| Perceived Stress Survey          | PercStress_Unadj | Stress and self-efficacy |
| Self-Efficacy Survey             | SelfEff_Unadj    | Stress and self-efficacy |

**Table S2. Measures from HCP Emotion domain entered into principal components analysis to derive emotion score. All items from NIH Emotion Toolbox.**
